# Supplementary material for: Association of Genetically Predicted Lipid Levels With the Extent of Coronary Atherosclerosis in Icelandic Adults
Source: PubMed Central journal article supplement — JAMA Cardiol. 2019 Nov 20;5(1):13–20. doi: 10.1001/jamacardio.2019.2946 (PMC6902100; doi:10.1001/jamacardio.2019.2946), 2019-11-20
Supplement: jamacardiol-5-13-s001.pdf [file jamacardiol-5-13-s001.pdf]

## Supplementary Online Content

Björnsson E, Thorleifsson G, Helgadóttir A, et al. Association of genetically predicted lipid levels with the extent of coronary atherosclerosis in Icelandic adults. *JAMA Cardiol*. Published online November 20, 2019. doi:10.1001/jamacardio.2019.2946

**eMethods.** Methods.

**eTable 1.** Reported Lipid-Associated Variants Used for Calculation of the Genetic Scores

**eTable 2.** Relationship of Genetic Scores with Their Respective Lipid Traits

**eTable 3.** Pairwise-Correlations for Genetic Scores (Blue) and Lipid Traits (Green)

**eTable 4.** Genetic Scores for Lipid Levels and Angiographic Extent of CAD

**eTable 5.** Lipid levels in Genotyped Icelanders

**eTable 6.** Association of the non-HDL-C Genetic Score with Coronary Artery Disease

**eFigure 1.** Generation of the Combined Coronary Angiography Dataset

**eFigure 2.** Selection of Lipid Variants and Calculation of Genetic Scores

**eReferences.** References

This supplementary material has been provided by the authors to give readers additional information about their work.

## eMethods. Methods.

### The UK Biobank Study

In the years 2006–2010, the UK Biobank study recruited 502,647 individuals aged 37–76 years from across the country<sup>1</sup>. All participants provided information regarding their health and lifestyle via touch screen questionnaires, consented to physical and genetic measurements, and agreed to have their health followed. Genotype imputation data was available for 487,409 participants (May 2017 release), of which 408,658 were used in the analysis. The 408,658 individuals were selected as self-reported white British with similar genetic ancestry based on principal component analysis and with consistent reported and genetically determined gender. Imputation was performed by Wellcome Trust Centre for Human Genetics using the Haplotype Reference Consortium (HRC) and the UK10K haplotype resources.<sup>2</sup> The UK Biobank has ethical approval from the Northwest Multi-Centre Research Ethics Committee, and informed consent was obtained from all participants. The UK Biobank resource was accessed under Application Number '24711'.

### Testing for Association with risk of CAD

Tests of association with risk of CAD were performed using Icelandic data with replication in participants of the UK Biobank study. Icelandic CAD cases (n = 19 123) were defined as previously described<sup>3</sup>, primarily on the basis of International Classification of Diseases (ICD) codes indicative of CAD (including myocardial infarction) from LUH, documentation of obstructive CAD on coronary angiography (using the registries described in the main text), relevant surgical procedure codes or death due to coronary heart disease. For participants in the UK Biobank, cases of CAD (n = 28 110) were defined on the basis of ICD codes indicative of CAD (including myocardial infarction) or relevant surgical procedure codes.

### Blood Lipid Measurements

We obtained blood lipid measurements from three of the largest clinical laboratories in Iceland: (i) Landspítali – The National University Hospital, Reykjavík (hospitalized and ambulatory patients); (ii) the Laboratory in Mjódd, Reykjavík (ambulatory patients); and (iii) Akureyri Hospital, Regional Hospital in North Iceland, Akureyri (hospitalized and ambulatory patients). LDL cholesterol was calculated using the Friedewald equation<sup>4</sup> for triglyceride levels <4.00 mmol/L (350 mg/dL). Non-HDL cholesterol was calculated by subtracting HDL cholesterol from total cholesterol. For individuals taking lipid-lowering medication, total cholesterol was multiplied by 1.25 and the modified value was used for calculation of LDL cholesterol and non-HDL cholesterol. Triglycerides were log-transformed using the natural logarithm. For each lipid trait, residuals were obtained after accounting for age, age<sup>2</sup>, sex, measurement site and county of birth. For individuals with multiple measurements, we used the average of the residuals after adjustment for covariates. Mean lipid levels (raw measurements and adjusted residuals) in genotyped Icelanders are presented in **eTable 5**.

eTable 1. Reported Lipid-Associated Variants Used for Calculation of the Genetic Scores

| Position (hg19)                                                                     | Position (hg38) | dbSNP (build 146) | Gene            | Context    | Alleles (REF/ALT) | Allele frequency (ALT) |          | Imputation information | Effect sizes (SD) for calculation of genetic scores <sup>a</sup> |          |          |         |          |
|-------------------------------------------------------------------------------------|-----------------|-------------------|-----------------|------------|-------------------|------------------------|----------|------------------------|------------------------------------------------------------------|----------|----------|---------|----------|
|                                                                                     |                 |                   |                 |            |                   | Reported               | Iceland  |                        | TC                                                               | HDL-C    | nonHDL-C | LDL-C   | TG       |
| 345 variants used for calculation of the genetic scores, with pairwise $r^2 < 0.20$ |                 |                   |                 |            |                   |                        |          |                        |                                                                  |          |          |         |          |
| 1:109817590                                                                         | chr1:109274968  | rs12740374        | <i>CELSR2</i>   | Utr3       | G/T               | 0.22                   | 0.20     | 1                      | -0.13                                                            | 0.045    | -0.14    | -0.16   | -0.016   |
| 1:150940625                                                                         | chr1:150968149  | rs267738          | <i>LASS2</i>    | Glu115Ala  | T/G               | 0.18                   | 0.23     | 1                      | -0.0069                                                          | 0.024    | -0.015   | -0.013  | -0.0028  |
| 1:155106227                                                                         | chr1:155133751  | rs4745            | <i>EFNA1</i>    | Asp137Val  | A/T               | 0.49                   | 0.45     | 1                      | -0.013                                                           | 0.0033   | -0.014   | -0.015  | -0.0017  |
| 1:156700651                                                                         | chr1:156730859  | rs12145743        | <i>RRNAD1</i>   | Intron     | T/G               | 0.31                   | 0.28     | 1                      | 0.00091                                                          | 0.017    | -0.0051  | -0.0017 | -0.011   |
| 1:172346548                                                                         | chr1:172377408  | rs1011731         | <i>DNM3</i>     | Intron     | G/A               | 0.56                   | 0.57     | 1                      | -0.0039                                                          | 0.015    | -0.0091  | -0.0038 | -0.015   |
| 1:178515312                                                                         | chr1:178546177  | rs4650994         | <i>C1orf220</i> | Intron     | G/A               | 0.49                   | 0.49     | 1                      | -0.0011                                                          | -0.019   | 0.0056   | 0.0022  | 0.0092   |
| 1:182168885                                                                         | chr1:182199750  | rs1689800         | <i>ZNF648</i>   | Intergenic | A/G               | 0.34                   | 0.33     | 1                      | 0.0034                                                           | -0.025   | 0.012    | 0.013   | 0.0083   |
| 1:183094547                                                                         | chr1:183125412  | rs20558           | <i>LAMC1</i>    | Leu888Pro  | T/C               | 0.56                   | 0.52     | 1                      | 0.016                                                            | 0.0095   | 0.012    | 0.015   | -0.00053 |
| 1:219687432                                                                         | chr1:219514090  | rs2785990         | <i>LYPLAL1</i>  | Intergenic | C/T               | 0.68                   | 0.63     | 1                      | 0.0098                                                           | -0.015   | 0.015    | 0.0095  | 0.016    |
| 1:221057646                                                                         | chr1:220884304  | rs2738755         | <i>HLX</i>      | Pro356Leu  | C/T               | 0.33                   | 0.30     | 1                      | -0.013                                                           | -0.0032  | -0.012   | -0.015  | 0.0043   |
| 1:230295691                                                                         | chr1:230159944  | rs4846914         | <i>GALNT2</i>   | Intron     | G/A               | 0.55                   | 0.60     | 0.999                  | 0.0023                                                           | 0.049    | -0.015   | 0.00016 | -0.039   |
| 1:23766233                                                                          | chr1:23439740   | rs1077514         | <i>ASAP3</i>    | Intron     | C/T               | 0.82                   | 0.83     | 1                      | 0.027                                                            | 0.0099   | 0.023    | 0.015   | 0.019    |
| 1:25768937                                                                          | chr1:25442446   | rs10903129        | <i>TMEM57</i>   | Intron     | A/G               | 0.53                   | 0.52     | 1                      | 0.028                                                            | 0.0047   | 0.026    | 0.028   | 0.0076   |
| 1:27138393                                                                          | chr1:26811902   | rs12748152        | <i>PIGV</i>     | Intergenic | C/T               | 0.072                  | 0.12     | 1                      | 0.02                                                             | -0.043   | 0.035    | 0.031   | 0.031    |
| 1:40028180                                                                          | chr1:39562508   | rs4660293         | <i>PABPC4</i>   | Intron     | A/G               | 0.21                   | 0.23     | 1                      | -0.0065                                                          | -0.04    | 0.0078   | 0.00097 | 0.024    |
| 1:55496039                                                                          | chr1:55030366   | rs11206510        | <i>PCSK9</i>    | Intergenic | T/C               | 0.17                   | 0.17     | 0.999                  | -0.064                                                           | 0.0065   | -0.065   | -0.07   | -0.01    |
| 1:55504650                                                                          | chr1:55038977   | rs2479409         | <i>PCSK9</i>    | Intergenic | G/A               | 0.66                   | 0.68     | 0.999                  | -0.04                                                            | 0.0095   | -0.043   | -0.047  | -0.002   |
| 1:55505647                                                                          | chr1:55039974   | rs11591147        | <i>PCSK9</i>    | Arg46Leu   | G/T               | 0.015                  | 0.012    | 0.999                  | -0.41                                                            | 0.042    | -0.42    | -0.48   | -0.0049  |
| 1:55509585                                                                          | chr1:55043912   | rs151193009       | <i>PCSK9</i>    | Arg93Cys   | C/T               | 0.00054                | 0.000013 | 1                      | -0.61                                                            | -0.05    | -0.58    | -0.68   | 0.012    |
| 1:55529187                                                                          | chr1:55063514   | rs505151          | <i>PCSK9</i>    | Gly670Glu  | G/A               | 0.95                   | 0.93     | 1                      | -0.08                                                            | 0.0078   | -0.081   | -0.09   | -0.0066  |
| 1:63118196                                                                          | chr1:62652525   | rs10889353        | <i>DOCK7</i>    | Intron     | A/C               | 0.33                   | 0.33     | 1                      | -0.072                                                           | -0.01    | -0.067   | -0.045  | -0.077   |
| 1:93009438                                                                          | chr1:92543881   | rs7515577         | <i>EVI5</i>     | Intron     | C/A               | 0.82                   | 0.80     | 1                      | 0.031                                                            | 0.0042   | 0.029    | 0.03    | 0.0091   |
| 1:93584606                                                                          | chr1:93119049   | rs4847399         | <i>MTF2</i>     | Intron     | G/A               | 0.61                   | 0.59     | 1                      | -0.014                                                           | -0.021   | -0.0063  | -0.012  | 0.0096   |
| 2:101627925                                                                         | chr2:101011463  | rs1062062         | <i>TBC1D8</i>   | Gly954Arg  | C/T               | 0.12                   | 0.10     | 1                      | -0.021                                                           | 0.0024   | -0.021   | -0.021  | -0.0045  |
| 2:113841030                                                                         | chr2:113083453  | rs6734238         | <i>DRAM2</i>    | Intergenic | A/G               | 0.39                   | 0.45     | 1                      | -0.014                                                           | -0.00041 | -0.014   | -0.012  | -0.01    |
| 2:118815958                                                                         | chr2:118058382  | rs17526895        | <i>MTOR</i>     | Intergenic | A/G               | 0.068                  | 0.069    | 1                      | -0.047                                                           | 0.0042   | -0.047   | -0.054  | -0.0099  |
| 2:121309488                                                                         | chr2:120551912  | rs2030746         | <i>PTPN22</i>   | Intergenic | C/T               | 0.41                   | 0.40     | 1                      | 0.014                                                            | -0.0014  | 0.014    | 0.014   | 0.0046   |
| 2:136590746                                                                         | chr2:135833176  | rs3754689         | <i>LCT</i>      | Val219Ile  | C/T               | 0.18                   | 0.09     | 1                      | 0.027                                                            | 0.019    | 0.02     | 0.019   | -0.004   |
| 2:165528876                                                                         | chr2:164672366  | rs13389219        | <i>FLG</i>      | Intergenic | C/T               | 0.40                   | 0.45     | 1                      | -0.0069                                                          | 0.035    | -0.019   | -0.0095 | -0.037   |
| 2:165551201                                                                         | chr2:164694691  | rs7607980         | <i>COBLL1</i>   | Asn939Asp  | T/C               | 0.12                   | 0.14     | 1                      | -0.00045                                                         | 0.05     | -0.018   | -0.0041 | -0.045   |
| 2:169830155                                                                         | chr2:168973645  | rs2287623         | <i>ABCB11</i>   | Intron     | G/A               | 0.59                   | 0.61     | 1                      | -0.021                                                           | -0.006   | -0.018   | -0.021  | -0.008   |
| 2:202122995                                                                         | chr2:201258272  | rs3769823         | <i>CASP8</i>    | Lys14Arg   | A/G               | 0.69                   | 0.68     | 1                      | 0.0068                                                           | -0.0027  | 0.0076   | 0.0013  | 0.017    |
| 2:20396122                                                                          | chr2:20196361   | rs6749689         | <i>EPHA2</i>    | Intergenic | T/C               | 0.57                   | 0.58     | 0.999                  | -0.02                                                            | -0.01    | -0.016   | -0.011  | -0.016   |
| 2:203519783                                                                         | chr2:202655060  | rs6435161         | <i>FAM117B</i>  | Intron     | T/G               | 0.27                   | 0.31     | 1                      | -0.027                                                           | -0.014   | -0.021   | -0.018  | -0.018   |
| 2:203880992                                                                         | chr2:203016269  | rs2351524         | <i>NBEAL1</i>   | Utr5       | T/C               | 0.89                   | 0.87     | 1                      | 0.027                                                            | 0.0054   | 0.025    | 0.024   | 0.01     |
| 2:21225485                                                                          | chr2:21002613   | rs1801702         | <i>APOB</i>     | Arg4270Thr | C/G               | 0.027                  | 0.008    | 1                      | -0.082                                                           | 0.016    | -0.086   | -0.091  | -0.0064  |
| 2:21229160                                                                          | chr2:21006288   | rs5742904         | <i>APOB</i>     | Arg3527Gln | C/T               | 0.00038                | 0.000027 | 0.97                   | 1.28                                                             | -0.016   | 1.3      | 1.48    | -0.22    |
| 2:21231524                                                                          | chr2:21008652   | rs676210          | <i>APOB</i>     | Pro2739Leu | G/A               | 0.26                   | 0.23     | 1                      | -0.037                                                           | 0.06     | -0.057   | -0.039  | -0.071   |
| 2:21233972                                                                          | chr2:21011100   | rs533617          | <i>APOB</i>     | His1923Arg | T/C               | 0.039                  | 0.044    | 0.999                  | -0.11                                                            | 0.085    | -0.14    | -0.13   | -0.098   |
| 2:21238367                                                                          | chr2:21015495   | rs12713843        | <i>APOB</i>     | Arg1128His | C/T               | 0.0044                 | 0.002    | 1                      | -0.19                                                            | 0.08     | -0.21    | -0.23   | -0.078   |
| 2:21252534                                                                          | chr2:21029662   | rs13306194        | <i>APOB</i>     | Arg532Trp  | G/A               | 0.0051                 | 0.000058 | 1                      | -0.11                                                            | 0.056    | -0.13    | -0.12   | -0.096   |
| 2:21263900                                                                          | chr2:21041028   | rs1367117         | <i>APOB</i>     | Thr98Ile   | G/A               | 0.29                   | 0.35     | 0.999                  | 0.092                                                            | -0.02    | 0.097    | 0.11    | 0.023    |

|             |                |             |                  |            |     |        |        |       |         |         |          |          |           |
|-------------|----------------|-------------|------------------|------------|-----|--------|--------|-------|---------|---------|----------|----------|-----------|
| 2:21294975  | chr2:21072103  | rs541041    | <i>TNFSF4</i>    | Intergenic | G/A | 0.81   | 0.85   | 1     | 0.11    | -0.0095 | 0.11     | 0.12     | 0.018     |
| 2:219555262 | chr2:218690539 | rs1344642   | <i>STK36</i>     | Arg583Gln  | G/A | 0.44   | 0.43   | 1     | -0.0091 | 0.0066  | -0.011   | -0.0077  | -0.015    |
| 2:227093745 | chr2:226229029 | rs2943641   | <i>ALDH4A1</i>   | Intergenic | T/C | 0.66   | 0.61   | 1     | 0.0045  | -0.036  | 0.017    | 0.0067   | 0.033     |
| 2:234668570 | chr2:233759924 | rs887829    | <i>UGT1A10</i>   | Intron     | C/T | 0.34   | 0.32   | 1     | -0.023  | 0.00023 | -0.023   | -0.022   | -0.0072   |
| 2:272203    | chr2:272203    | rs11553746  | <i>ACP1</i>      | Thr95Ile   | C/T | 0.33   | 0.36   | 1     | 0.0031  | 0.015   | -0.0023  | 0.004    | -0.012    |
| 2:27726437  | chr2:27503570  | rs147073127 | <i>GCKR</i>      | Gln234Pro  | A/C | 0.0024 | 0.006  | 1     | 0.11    | -0.016  | 0.11     | 0.073    | 0.14      |
| 2:27730940  | chr2:27508073  | rs1260326   | <i>GCKR</i>      | Leu446Pro  | T/C | 0.63   | 0.65   | 1     | -0.057  | 0.0058  | -0.058   | -0.023   | -0.12     |
| 2:44028013  | chr2:43800874  | rs11556157  | <i>DYNC2L1</i>   | Ile230Leu  | A/T | 0.26   | 0.26   | 1     | 0.023   | -0.0046 | 0.024    | 0.025    | 0.008     |
| 2:44066247  | chr2:43839108  | rs11887534  | <i>ABCG8</i>     | Asp19His   | G/C | 0.063  | 0.054  | 1     | -0.11   | 0.0055  | -0.11    | -0.11    | -0.021    |
| 2:44074431  | chr2:43847292  | rs4245791   | <i>ABCG8</i>     | Intron     | C/T | 0.72   | 0.71   | 1     | -0.068  | 0.0068  | -0.069   | -0.072   | -0.019    |
| 2:54482553  | chr2:54255416  | rs17189743  | <i>TSPYL6</i>    | Arg246Cys  | G/A | 0.028  | 0.02   | 1     | 0.014   | 0.04    | -0.00046 | 0.018    | -0.034    |
| 2:62871225  | chr2:62644090  | rs11125936  | <i>TCEB3</i>     | Intergenic | T/C | 0.10   | 0.12   | 1     | -0.026  | 0.011   | -0.029   | -0.028   | -0.016    |
| 3:123065778 | chr3:123346931 | rs11708067  | <i>ADCY5</i>     | Intron     | A/G | 0.21   | 0.21   | 1     | -0.018  | -0.015  | -0.012   | -0.0098  | -0.0011   |
| 3:12393125  | chr3:12351626  | rs1801282   | <i>PPARG</i>     | Pro12Ala   | C/G | 0.12   | 0.12   | 1     | -0.0058 | 0.02    | -0.013   | -0.0033  | -0.023    |
| 3:12628920  | chr3:12587421  | rs2290159   | <i>RAF1</i>      | Intron     | G/C | 0.20   | 0.21   | 1     | -0.023  | -0.0093 | -0.019   | -0.021   | -0.011    |
| 3:135926622 | chr3:136207780 | rs645040    | <i>RFX5</i>      | Intergenic | G/T | 0.78   | 0.76   | 1     | 0.0095  | -0.021  | 0.017    | 0.011    | 0.023     |
| 3:156798732 | chr3:157080943 | rs900399    | <i>SEMA4A</i>    | Intergenic | A/G | 0.38   | 0.33   | 0.999 | 0.0071  | 0.019   | 0.00022  | 0.0066   | -0.014    |
| 3:185834499 | chr3:186116710 | rs9816226   | <i>B4GALT3</i>   | Intergenic | A/T | 0.83   | 0.78   | 1     | 0.018   | 0.028   | 0.0077   | 0.0057   | 0.0091    |
| 3:32533010  | chr3:32491518  | rs7640978   | <i>CMTM6</i>     | Intron     | C/T | 0.092  | 0.079  | 1     | -0.031  | -0.0039 | -0.029   | -0.033   | -0.0036   |
| 3:47045846  | chr3:47004356  | rs2305637   | <i>NBEAL2</i>    | Ser2054Phe | C/T | 0.16   | 0.15   | 0.999 | -0.0018 | -0.032  | 0.0096   | 0.002    | 0.016     |
| 3:47282303  | chr3:47240813  | rs2276853   | <i>KIF9</i>      | Arg573Trp  | G/A | 0.59   | 0.62   | 1     | -0.0043 | -0.015  | 0.0011   | -0.0046  | 0.011     |
| 3:48229366  | chr3:48187876  | rs146179438 | <i>CDC25A</i>    | Gln25His   | C/A | 0.02   | 0.012  | 0.998 | -0.034  | -0.063  | -0.011   | -0.0071  | -0.0042   |
| 3:50093209  | chr3:50055776  | rs6762477   | <i>RBM6</i>      | Intron     | G/A | 0.60   | 0.55   | 1     | 0.01    | 0.025   | 0.00094  | -0.00049 | -0.0039   |
| 3:50369546  | chr3:50332115  | rs2073498   | <i>RASSF1</i>    | Ala63Ser   | C/A | 0.10   | 0.091  | 1     | -0.025  | -0.019  | -0.018   | -0.015   | -0.0078   |
| 3:52532118  | chr3:52498102  | rs13326165  | <i>STAB1</i>     | Intron     | A/G | 0.81   | 0.80   | 1     | 0.002   | -0.025  | 0.011    | 0.0033   | 0.02      |
| 3:52584787  | chr3:52550771  | rs2251219   | <i>PBRM1</i>     | Pro1466Pro | T/C | 0.38   | 0.40   | 1     | 0.013   | 0.00069 | 0.012    | 0.016    | -0.00086  |
| 3:57528503  | chr3:57542776  | rs9311651   | <i>DNAH12</i>    | Val32Ala   | A/G | 0.17   | 0.16   | 1     | -0.0027 | 0.019   | -0.0094  | -0.0021  | -0.021    |
| 3:58381287  | chr3:58395560  | rs13315871  | <i>PXK</i>       | Intron     | G/A | 0.085  | 0.067  | 1     | -0.032  | -0.0039 | -0.03    | -0.038   | -0.0025   |
| 4:103188709 | chr4:102267552 | rs13107325  | <i>SLC39A8</i>   | Ala391Thr  | C/T | 0.051  | 0.016  | 0.996 | -0.043  | -0.074  | -0.016   | -0.035   | 0.034     |
| 4:155489608 | chr4:154568456 | rs6054      | <i>FGB</i>       | Pro206Leu  | C/T | 0.0038 | 0.0034 | 0.999 | 0.14    | -0.027  | 0.15     | 0.091    | 0.14      |
| 4:187120211 | chr4:186199057 | rs13146272  | <i>CYP4V2</i>    | Gln259Lys  | C/A | 0.62   | 0.60   | 1     | -0.011  | 0.0034  | -0.012   | -0.015   | 0.00043   |
| 4:3434885   | chr4:3433158   | rs6818397   | <i>RGS12</i>     | Intron     | T/G | 0.59   | 0.60   | 0.999 | -0.016  | 0.0077  | -0.018   | -0.012   | -0.021    |
| 4:3446091   | chr4:3444364   | rs3748034   | <i>HGFAC</i>     | Ala218Ser  | G/T | 0.14   | 0.12   | 0.999 | 0.025   | -0.0068 | 0.027    | 0.019    | 0.035     |
| 4:3449652   | chr4:3447925   | rs16844401  | <i>HGFAC</i>     | Arg509His  | G/A | 0.066  | 0.054  | 0.999 | 0.027   | 0.0021  | 0.026    | 0.02     | 0.03      |
| 4:3473139   | chr4:3471412   | rs6831256   | <i>DOK7</i>      | Intron     | A/G | 0.44   | 0.39   | 0.999 | 0.016   | -0.0078 | 0.018    | 0.013    | 0.021     |
| 4:69343287  | chr4:68477569  | rs976002    | <i>TMPRSS11E</i> | Tyr303Cys  | A/G | 0.23   | 0.24   | 0.998 | 0.029   | 0.0085  | 0.025    | 0.023    | 0.015     |
| 4:88030261  | chr4:87109109  | rs442177    | <i>AFF1</i>      | Intron     | G/T | 0.57   | 0.59   | 1     | 0.013   | -0.018  | 0.019    | 0.0085   | 0.031     |
| 4:89740128  | chr4:88818977  | rs13133548  | <i>FAM13A</i>    | Intron     | G/A | 0.48   | 0.37   | 1     | 0.00063 | -0.017  | 0.0066   | 0.0037   | 0.014     |
| 4:100045616 | chr4:99124465  | rs1126673   | <i>ADH4</i>      | Val374Ile  | C/T | 0.72   | 0.69   | 1     | 0.0063  | -0.014  | 0.011    | 0.0056   | 0.017     |
| 4:100504664 | chr4:99583507  | rs3816873   | <i>MTTP</i>      | Ile128Thr  | T/C | 0.26   | 0.24   | 1     | -0.015  | -0.0086 | -0.012   | -0.017   | -0.0034   |
| 5:122855416 | chr5:123519722 | rs4530754   | <i>CSNK1G3</i>   | Intron     | G/A | 0.55   | 0.52   | 1     | 0.015   | 0.0053  | 0.013    | 0.017    | -2.90E-03 |
| 5:131008194 | chr5:131672501 | rs26008     | <i>FNIP1</i>     | Gln620Arg  | T/C | 0.92   | 0.94   | 1     | -0.0027 | 0.016   | -0.0083  | 0.0027   | -0.028    |
| 5:131744574 | chr5:132408882 | rs1016988   | <i>CD101</i>     | Intergenic | T/C | 0.22   | 0.20   | 1     | -0.014  | -0.0034 | -0.012   | -0.02    | 0.0088    |
| 5:156398169 | chr5:156971158 | rs1501908   | <i>ATP1A2</i>    | Intergenic | G/C | 0.63   | 0.63   | 1     | 0.047   | -0.0015 | 0.047    | 0.04     | 0.038     |
| 5:176520243 | chr5:177093242 | rs351855    | <i>FGFR4</i>     | Gly388Arg  | G/A | 0.29   | 0.32   | 0.998 | -0.013  | 0.01    | -0.016   | -0.018   | -0.0082   |
| 5:176637576 | chr5:177210575 | rs28932178  | <i>NSD1</i>      | Ser457Pro  | T/C | 0.17   | 0.15   | 1     | -0.0048 | 0.02    | -0.012   | -0.0089  | -0.017    |
| 5:53300662  | chr5:54004832  | rs4311394   | <i>ARL15</i>     | Intron     | A/G | 0.27   | 0.24   | 1     | 0.0045  | -0.014  | 0.0094   | 0.0039   | 0.018     |
| 5:55806751  | chr5:56510924  | rs459193    | <i>ASPM</i>      | Intergenic | A/G | 0.71   | 0.72   | 1     | -0.0034 | -0.02   | 0.0038   | -0.0051  | 0.023     |

|             |                |            |                 |            |     |        |          |       |         |           |         |         |         |
|-------------|----------------|------------|-----------------|------------|-----|--------|----------|-------|---------|-----------|---------|---------|---------|
| 5:55861786  | chr5:56565959  | rs9686661  | <i>ASPM</i>     | Intergenic | C/T | 0.19   | 0.17     | 1     | 0.012   | -0.032    | 0.023   | 0.0095  | 0.042   |
| 5:67714246  | chr5:68418419  | rs4976033  | <i>IGFN1</i>    | Intergenic | A/G | 0.42   | 0.39     | 0.999 | 0.0032  | -0.015    | 0.0084  | 0.0029  | 0.018   |
| 5:74648603  | chr5:75352778  | rs12654264 | <i>HMGCR</i>    | Intron     | A/T | 0.40   | 0.35     | 1     | 0.062   | 0.0061    | 0.059   | 0.066   | 0.0034  |
| 6:116387134 | chr6:116065971 | rs1999930  | <i>SLC16A4</i>  | Intergenic | C/T | 0.25   | 0.28     | 1     | -0.019  | -0.01     | -0.015  | -0.018  | 0.0019  |
| 6:127452935 | chr6:127131790 | rs2745353  | <i>RSPO3</i>    | Intron     | C/T | 0.53   | 0.56     | 1     | 0.0024  | -0.023    | 0.01    | 0.003   | 0.02    |
| 6:135411228 | chr6:135090090 | rs9376090  | <i>VPS13D</i>   | Intergenic | T/C | 0.24   | 0.27     | 1     | -0.03   | -0.016    | -0.024  | -0.025  | -0.003  |
| 6:135418635 | chr6:135097497 | rs7775698  | <i>VPS13D</i>   | Intergenic | C/T | 0.25   | 0.000032 | 1     | -0.03   | -0.014    | -0.024  | -0.026  | -0.0032 |
| 6:139839423 | chr6:139518286 | rs643381   | <i>TXNIP</i>    | Intergenic | C/A | 0.50   | 0.51     | 0.998 | -0.0072 | 0.023     | -0.015  | -0.006  | -0.023  |
| 6:151901409 | chr6:151580274 | rs4870044  | <i>C6orf97</i>  | Intron     | C/T | 0.34   | 0.28     | 1     | 0.015   | -7.30E-05 | 0.015   | 0.014   | 0.0062  |
| 6:153431125 | chr6:153109990 | rs12055786 | <i>RGS17</i>    | Intron     | C/T | 0.44   | 0.43     | 1     | -0.0016 | -0.021    | 0.0059  | -0.0024 | 0.012   |
| 6:160543148 | chr6:160122116 | rs12208357 | <i>SLC22A1</i>  | Arg61Cys   | C/T | 0.062  | 0.042    | 0.999 | 0.05    | -0.026    | 0.058   | 0.058   | 0.032   |
| 6:160578860 | chr6:160157828 | rs1564348  | <i>SLC22A1</i>  | Intron     | T/C | 0.15   | 0.18     | 1     | 0.045   | -0.0028   | 0.045   | 0.047   | 0.02    |
| 6:160872151 | chr6:160451119 | rs1810126  | <i>SLC22A3</i>  | Utr3       | C/T | 0.35   | 0.39     | 1     | 0.023   | -0.0082   | 0.025   | 0.025   | 0.014   |
| 6:160961137 | chr6:160540105 | rs3798220  | <i>LPA</i>      | Ile1892Met | T/C | 0.019  | 0.018    | 1     | 0.11    | -0.0051   | 0.11    | 0.11    | 0.016   |
| 6:161018174 | chr6:160597142 | rs7770628  | <i>LPA</i>      | Intron     | C/T | 0.57   | 0.55     | 1     | -0.031  | -0.012    | -0.026  | -0.031  | 0.0015  |
| 6:161089817 | chr6:160668785 | rs1084651  | <i>PMVK</i>     | Intergenic | G/A | 0.19   | 0.16     | 0.999 | -0.023  | -0.031    | -0.012  | -0.017  | 0.011   |
| 6:16145325  | chr6:16145094  | rs9370867  | <i>MYLIP</i>    | Asn342Ser  | A/G | 0.53   | 0.49     | 1     | -0.027  | 0.0063    | -0.029  | -0.033  | -0.0015 |
| 6:25914853  | chr6:25914625  | rs34525648 | <i>SLC17A2</i>  | Ser370Leu  | G/A | 0.092  | 0.08     | 1     | -0.0039 | -0.025    | 0.005   | 0.0069  | -0.0012 |
| 6:26093141  | chr6:26092913  | rs1800562  | <i>HFE</i>      | Cys102Tyr  | G/A | 0.049  | 0.066    | 0.999 | -0.037  | 0.007     | -0.039  | -0.044  | 0.0081  |
| 6:30372812  | chr6:30405035  | rs1264562  | <i>ZBTB17</i>   | Intergenic | G/T | 0.42   | 0.38     | 1     | 0.0099  | -0.0016   | 0.01    | 0.015   | -0.0013 |
| 6:31101674  | chr6:31133897  | rs3130564  | <i>PSORS1C1</i> | Intron     | C/T | 0.16   | 0.17     | 1     | -0.028  | -0.0092   | -0.024  | -0.012  | -0.033  |
| 6:31262169  | chr6:31294392  | rs3873379  | <i>BLZF1</i>    | Intergenic | T/C | 0.32   | 0.30     | 1     | 0.013   | -0.0076   | 0.015   | 0.0089  | 0.028   |
| 6:31353593  | chr6:31385816  | rs2844529  | <i>C1orf114</i> | Intergenic | G/A | 0.34   | 0.27     | 1     | 0.028   | 0.014     | 0.022   | 0.018   | 0.0094  |
| 6:31440497  | chr6:31472720  | rs2516440  | <i>F5</i>       | Intergenic | G/A | 0.34   | 0.28     | 0.998 | 0.024   | 0.0068    | 0.021   | 0.018   | 0.0088  |
| 6:31564821  | chr6:31597044  | rs2844480  | <i>F5</i>       | Intergenic | C/T | 0.20   | 0.18     | 1     | 0.01    | -0.0049   | 0.012   | 0.0094  | 0.023   |
| 6:31753526  | chr6:31785749  | rs11751198 | <i>VARS</i>     | Intron     | G/A | 0.049  | 0.024    | 1     | 0.047   | 0.0034    | 0.045   | 0.027   | 0.021   |
| 6:32041621  | chr6:32073844  | rs6910390  | <i>TNXB</i>     | Thr1495Ile | G/A | 0.0051 | 0.0075   | 1     | 0.027   | -0.059    | 0.047   | 0.0037  | 0.1     |
| 6:32050758  | chr6:32082981  | rs1150754  | <i>TNXB</i>     | Intron     | C/T | 0.12   | 0.13     | 1     | -0.028  | -0.024    | -0.019  | -0.012  | -0.015  |
| 6:32052444  | chr6:32084667  | rs61995676 | <i>TNXB</i>     | Arg1064His | C/T | 0.02   | 0.041    | 1     | 0.024   | -0.064    | 0.046   | 0.023   | 0.093   |
| 6:32671103  | chr6:32703326  | rs13192471 | <i>ASTN1</i>    | Intergenic | T/C | 0.16   | 0.16     | 1     | 0.038   | 0.001     | 0.037   | 0.038   | 0.017   |
| 6:32681631  | chr6:32713854  | rs9275596  | <i>ASTN1</i>    | Intergenic | C/T | 0.64   | 0.51     | 1     | 0.018   | 0.023     | 0.0095  | 0.01    | 0.0031  |
| 6:32813279  | chr6:32845502  | rs1057373  | <i>TAP1</i>     | Utr3       | C/A | 0.097  | 0.12     | 1     | 0.0089  | -0.014    | 0.014   | 0.0051  | 0.03    |
| 6:33774394  | chr6:33806617  | rs2894342  | <i>LAMC1</i>    | Intergenic | C/A | 0.23   | 0.25     | 1     | 0.00089 | 0.017     | -0.0051 | -0.0017 | -0.01   |
| 6:34546560  | chr6:34578783  | rs2814982  | <i>LAMC2</i>    | Intergenic | C/T | 0.12   | 0.087    | 0.999 | -0.025  | -0.028    | -0.015  | -0.017  | -0.0016 |
| 6:34824636  | chr6:34856859  | rs11755393 | <i>UHRF1BP1</i> | Gln454Arg  | A/G | 0.36   | 0.30     | 1     | -0.0056 | -0.027    | 0.0041  | 0.0019  | 0.002   |
| 6:39282806  | chr6:39315030  | rs11756091 | <i>KCNK16</i>   | Pro254His  | G/T | 0.51   | 0.48     | 1     | 0.014   | -0.0014   | 0.014   | 0.011   | 0.0053  |
| 6:43757896  | chr6:43790159  | rs998584   | <i>SH2D5</i>    | Intergenic | C/A | 0.48   | 0.46     | 0.999 | 0.012   | -0.026    | 0.021   | 0.0081  | 0.034   |
| 6:43785255  | chr6:43817518  | rs35349911 | <i>SH2D5</i>    | Intergenic | C/T | 0.57   | 0.55     | 0.998 | 0.0028  | -0.017    | 0.0088  | 0.0061  | 0.013   |
| 6:43811762  | chr6:43844025  | rs9472138  | <i>SH2D5</i>    | Intergenic | C/T | 0.27   | 0.27     | 1     | -0.01   | 0.013     | -0.014  | -0.0081 | -0.02   |
| 6:52453220  | chr6:52588422  | rs2239619  | <i>HSPG2</i>    | Intergenic | C/A | 0.62   | 0.62     | 1     | 0.016   | 2.50E-05  | 0.016   | 0.018   | 0.00098 |
| 7:1083777   | chr7:1044141   | rs1997243  | <i>C7orf50</i>  | Intron     | A/G | 0.14   | 0.11     | 1     | 0.027   | 0.026     | 0.017   | 0.018   | 0.0082  |
| 7:116358044 | chr7:116717990 | rs38855    | <i>MET</i>      | Intron     | A/G | 0.46   | 0.46     | 1     | -0.0047 | 0.01      | -0.0081 | -0.0035 | -0.014  |
| 7:130433384 | chr7:130748625 | rs4731702  | <i>SNX27</i>    | Intergenic | C/T | 0.46   | 0.55     | 1     | -0.0056 | 0.033     | -0.017  | -0.0066 | -0.027  |
| 7:150217309 | chr7:150520221 | rs3735080  | <i>GIMAP7</i>   | Arg83Cys   | C/T | 0.23   | 0.27     | 1     | -0.0059 | -0.017    | 0.00024 | -0.0059 | 0.016   |
| 7:17284577  | chr7:17244953  | rs4410790  | <i>NCSTN</i>    | Intergenic | T/C | 0.60   | 0.63     | 1     | 0.0047  | -0.011    | 0.0085  | 0.0055  | 0.015   |
| 7:17911038  | chr7:17871415  | rs10282707 | <i>SNX13</i>    | Intron     | C/T | 0.42   | 0.35     | 1     | -0.016  | -0.027    | -0.0061 | -0.014  | 0.011   |
| 7:21607352  | chr7:21567734  | rs12670798 | <i>DNAH11</i>   | Intron     | T/C | 0.25   | 0.22     | 1     | 0.032   | 0.0015    | 0.031   | 0.033   | 0.013   |
| 7:25991826  | chr7:25952206  | rs4722551  | <i>HMCN1</i>    | Intergenic | T/C | 0.16   | 0.14     | 0.999 | 0.027   | 0.0073    | 0.024   | 0.04    | -0.026  |

|              |                 |             |                 |            |     |         |          |       |          |           |          |          |         |
|--------------|-----------------|-------------|-----------------|------------|-----|---------|----------|-------|----------|-----------|----------|----------|---------|
| 7:44444122   | chr7:44404523   | rs11550029  | <i>NUDCD3</i>   | Arg235Cys  | G/A | 0.17    | 0.25     | 1     | 0.017    | -0.011    | 0.021    | 0.02     | 0.013   |
| 7:44578500   | chr7:44538901   | rs35803101  | <i>NPC1L1</i>   | Thr499Met  | G/A | 0.0029  | 0.0007   | 0.961 | -0.14    | -0.00055  | -0.14    | -0.16    | -0.0091 |
| 7:44578747   | chr7:44539148   | rs139659653 | <i>NPC1L1</i>   | Arg417Trp  | G/A | 0.0011  | 0.0009   | 0.997 | -0.17    | -2.00E-02 | -0.16    | -0.22    | 0.0031  |
| 7:50305863   | chr7:50266267   | rs4917014   | <i>PLEKHA6</i>  | Intergenic | T/G | 0.30    | 0.29     | 1     | 0.0053   | 0.017     | -0.00083 | -0.0016  | -0.0012 |
| 7:6449496    | chr7:6409865    | rs2303361   | <i>DAGLB</i>    | Gln535Arg  | T/C | 0.21    | 0.26     | 1     | 0.0075   | 0.025     | -0.0015  | -0.0015  | 0.0015  |
| 7:73012042   | chr7:73597712   | rs35332062  | <i>MLXIPL</i>   | Ala358Val  | G/A | 0.12    | 0.12     | 1     | -0.012   | 0.042     | -0.027   | 0.014    | -0.12   |
| 7:80300449   | chr7:80671133   | rs3211938   | <i>CD36</i>     | Tyr326Stp  | T/G | 0.0047  | 6.4E-06  | 1     | 0.073    | 0.18      | 0.0077   | 0.022    | -0.06   |
| 8:10683929   | chr8:10826419   | rs11776767  | <i>PINX1</i>    | Intron     | G/C | 0.37    | 0.41     | 1     | 0.0015   | -0.011    | 0.0054   | -0.0059  | 0.022   |
| 8:116599199  | chr8:115586972  | rs2293889   | <i>TRPS1</i>    | Intron     | T/G | 0.62    | 0.56     | 1     | -0.0033  | 0.029     | -0.013   | -0.015   | -0.0041 |
| 8:116648565  | chr8:115636338  | rs2737229   | <i>TRPS1</i>    | Intron     | A/C | 0.34    | 0.27     | 1     | -0.024   | -0.0013   | -0.023   | -0.022   | -0.013  |
| 8:11702375   | chr8:11844866   | rs3947      | <i>CTSB</i>     | Utr3       | G/A | 0.23    | 0.25     | 1     | 0.0098   | 0.004     | 0.0082   | -0.0016  | 0.024   |
| 8:121868551  | chr8:120856311  | rs4871137   | <i>KCND3</i>    | Intergenic | G/T | 0.64    | 0.66     | 1     | -0.01    | -0.022    | -0.002   | -0.002   | 0.00093 |
| 8:126490972  | chr8:125478730  | rs2954029   | <i>AMPD1</i>    | Intergenic | A/T | 0.45    | 0.48     | 1     | -0.059   | 0.035     | -0.07    | -0.048   | -0.08   |
| 8:145058986  | chr8:143984818  | rs11136343  | <i>PARP10</i>   | Leu395Pro  | A/G | 0.38    | 0.33     | 1     | 0.026    | -0.0044   | 0.027    | 0.029    | 0.0037  |
| 8:18272881   | chr8:18415371   | rs1495741   | <i>PGLYRP4</i>  | Intergenic | G/A | 0.75    | 0.80     | 1     | -0.034   | -0.0038   | -0.032   | -0.022   | -0.035  |
| 8:19805708   | chr8:19948197   | rs1801177   | <i>LPL</i>      | Asp36Asn   | G/A | 0.016   | 0.012    | 1     | 0.0015   | -0.2      | 0.072    | 0.0093   | 0.17    |
| 8:19813529   | chr8:19956018   | rs268       | <i>LPL</i>      | Asn318Ser  | A/G | 0.017   | 0.012    | 0.999 | 0.0019   | -0.26     | 0.094    | 0.019    | 0.24    |
| 8:19816934   | chr8:19959423   | rs301       | <i>LPL</i>      | Intron     | T/C | 0.24    | 0.25     | 0.999 | -0.0011  | 0.11      | -0.04    | 0.0034   | -0.12   |
| 8:55421614   | chr8:54509054   | rs10102164  | <i>CRP</i>      | Intergenic | G/A | 0.20    | 0.24     | 1     | 0.03     | -0.0048   | 0.031    | 0.031    | 0.015   |
| 8:59388565   | chr8:58476006   | rs2081687   | <i>IGSF9</i>    | Intergenic | T/C | 0.66    | 0.68     | 1     | -0.033   | -0.0026   | -0.031   | -0.028   | -0.019  |
| 8:61548494   | chr8:60635935   | rs626913    | <i>IGSF8</i>    | Intergenic | A/C | 0.52    | 0.47     | 0.999 | 0.016    | 0.0025    | 0.015    | 0.012    | 0.0099  |
| 8:9183596    | chr8:9326086    | rs4841132   | <i>NECAP2</i>   | Intergenic | A/G | 0.90    | 0.91     | 1     | 0.076    | 0.1       | 0.039    | 0.057    | -0.035  |
| 9:107556776  | chr9:104794495  | rs146292819 | <i>ABCA1</i>    | Asn1800His | T/G | 0.00047 | 0.00029  | 0.977 | -0.69    | -0.84     | -0.38    | -0.32    | -0.29   |
| 9:107560784  | chr9:104798503  | rs150125857 | <i>ABCA1</i>    | Arg1680Gln | C/T | 0.00044 | 0.00086  | 0.995 | -0.1     | -0.37     | 0.033    | 0.11     | 0.0012  |
| 9:107562804  | chr9:104800523  | rs2230808   | <i>ABCA1</i>    | Lys1587Arg | T/C | 0.74    | 0.74     | 1     | 0.017    | 0.027     | 0.0071   | 0.0058   | 0.0096  |
| 9:107578620  | chr9:104816339  | rs76881554  | <i>ABCA1</i>    | Ser1181Phe | G/A | 0.0019  | 0.00044  | 0.991 | -0.075   | -0.16     | -0.017   | 0.0027   | -0.052  |
| 9:107579632  | chr9:104817351  | rs33918808  | <i>ABCA1</i>    | Glu1173Asp | C/G | 0.035   | 0.022    | 1     | 0.03     | 0.071     | 0.0042   | 0.0021   | -0.0034 |
| 9:107586753  | chr9:104824472  | rs2066714   | <i>ABCA1</i>    | Ile884Met  | T/C | 0.15    | 0.10     | 1     | 0.032    | 0.043     | 0.016    | 0.015    | 0.0073  |
| 9:107646756  | chr9:104884475  | rs145183203 | <i>ABCA1</i>    | Pro85Leu   | G/A | 0.0015  | 0.000013 | 0.993 | -0.13    | -0.25     | -0.039   | -0.043   | -0.022  |
| 9:107647655  | chr9:104885374  | rs3890182   | <i>ABCA1</i>    | Intron     | G/A | 0.12    | 0.11     | 1     | -0.057   | -0.075    | -0.029   | -0.027   | -0.015  |
| 9:107664301  | chr9:104902020  | rs1883025   | <i>ABCA1</i>    | Intron     | C/T | 0.26    | 0.25     | 1     | -0.054   | -0.067    | -0.029   | -0.024   | -0.022  |
| 9:117166246  | chr9:114403966  | rs2274159   | <i>DFNB31</i>   | Val400Ala  | A/G | 0.48    | 0.43     | 1     | 0.013    | 0.011     | 0.0088   | 0.009    | 0.0024  |
| 9:136155000  | chr9:133279427  | rs635634    | <i>IL6R</i>     | Intergenic | C/T | 0.19    | 0.23     | 1     | 0.073    | 0.017     | 0.065    | 0.077    | -0.011  |
| 9:139368953  | chr9:136474501  | rs3812594   | <i>SEC16A</i>   | Arg1039Cys | G/A | 0.24    | 0.23     | 1     | -0.012   | 0.0044    | -0.013   | -0.018   | 0.0065  |
| 9:15296034   | chr9:15296036   | rs643531    | <i>TTC39B</i>   | Intron     | C/A | 0.88    | 0.86     | 1     | 0.027    | 0.053     | 0.0077   | 0.0041   | 0.019   |
| 9:16887366   | chr9:16887368   | rs3927680   | <i>OR6P1</i>    | Intergenic | T/A | 0.52    | 0.59     | 1     | -0.015   | 0.01      | -0.018   | -0.013   | -0.018  |
| 9:19376255   | chr9:19376257   | rs67710536  | <i>RPS6</i>     | Utr3       | A/C | 0.11    | 0.081    | 1     | 0.031    | 0.015     | 0.025    | 0.028    | 0.004   |
| 9:2640759    | chr9:2640759    | rs3780181   | <i>VLDLR</i>    | Intron     | A/G | 0.074   | 0.097    | 1     | -0.03    | -0.00053  | -0.029   | -0.037   | 0.006   |
| 9:28414339   | chr9:28414341   | rs10968576  | <i>LINGO2</i>   | Intron     | A/G | 0.29    | 0.31     | 1     | -0.0045  | -0.017    | 0.0016   | -0.00089 | 0.0096  |
| 9:5073770    | chr9:5073770    | rs77375493  | <i>JAK2</i>     | Val617Phe  | G/T | 0.0011  | 0.00002  | 0.942 | -0.32    | -0.21     | -0.24    | -0.3     | -0.059  |
| 10:101912064 | chr10:100152307 | rs2862954   | <i>ERLIN1</i>   | Ile291Val  | T/C | 0.41    | 0.49     | 0.999 | 0.014    | 0.016     | 0.008    | 0.0097   | 0.0064  |
| 10:113933886 | chr10:112174128 | rs2255141   | <i>GPAM</i>     | Intron     | A/G | 0.73    | 0.74     | 1     | -0.028   | -0.027    | -0.018   | -0.028   | 0.019   |
| 10:115789375 | chr10:114029616 | rs7076938   | <i>PLOD1</i>    | Intergenic | C/T | 0.73    | 0.77     | 1     | -0.00041 | 0.019     | -0.0071  | -0.00097 | -0.01   |
| 10:118397971 | chr10:116638460 | rs10885997  | <i>PNLIPRP2</i> | Gln387Arg  | A/G | 0.41    | 0.42     | 1     | 0.0096   | -0.0081   | 0.012    | 0.015    | 0.0017  |
| 10:118575606 | chr10:116816095 | rs740363    | <i>VPS13D</i>   | Intergenic | G/A | 0.45    | 0.47     | 1     | 0.0065   | 0.014     | 0.0014   | 0.0033   | -0.0055 |
| 10:124610027 | chr10:122850511 | rs1891110   | <i>FAM24B</i>   | Pro2Leu    | G/A | 0.55    | 0.55     | 1     | 0.019    | 0.0041    | 0.017    | 0.021    | 0.0031  |
| 10:17260290  | chr10:17218291  | rs10904908  | <i>PGLYRP4</i>  | Intergenic | A/G | 0.45    | 0.38     | 0.999 | 0.017    | 0.012     | 0.012    | 0.012    | 0.0073  |
| 10:46013277  | chr10:45517829  | rs970548    | <i>MARCH8</i>   | Intron     | A/C | 0.24    | 0.22     | 1     | 0.02     | 0.026     | 0.01     | 0.011    | 0.0025  |

|              |                 |             |          |                       |     |         |          |       |          |          |          |         |          |
|--------------|-----------------|-------------|----------|-----------------------|-----|---------|----------|-------|----------|----------|----------|---------|----------|
| 10:52573772  | chr10:50814012  | rs41274050  | A1CF     | Gly398Ser             | C/T | 0.0071  | 0.0024   | 0.99  | 0.08     | -0.038   | 0.092    | 0.057   | 0.1      |
| 10:65121565  | chr10:63361805  | rs12355784  | JMJD1C   | Intron                | C/A | 0.47    | 0.51     | 1     | 0.01     | 0.012    | 0.0055   | 0.018   | -0.03    |
| 10:74637326  | chr10:72877568  | rs7901016   | CCDC109A | Intron                | T/C | 0.069   | 0.049    | 1     | -0.0063  | -0.022   | 0.0016   | -0.018  | 0.042    |
| 10:94839642  | chr10:93079885  | rs2068888   | C1orf106 | Intergenic            | G/A | 0.47    | 0.42     | 0.999 | -0.018   | 0.023    | -0.026   | -0.016  | -0.032   |
| 11:10669228  | chr11:10647681  | rs7940646   | MRV1     | Intron                | T/C | 0.72    | 0.64     | 1     | 0.00094  | -0.0077  | 0.0036   | -0.0015 | 0.016    |
| 11:10995944  | chr11:110125219 | rs746463    | ZC3H12C  | Intron                | C/T | 0.69    | 0.71     | 1     | -0.0027  | -0.017   | 0.0034   | 0.00073 | 0.0099   |
| 11:116586283 | chr11:116715567 | rs7350481   | C1orf158 | Intergenic            | T/C | 0.91    | 0.92     | 1     | -0.082   | 0.098    | -0.11    | -0.028  | -0.23    |
| 11:116661488 | chr11:116790772 | rs3135507   | APOA5    | Val153Met             | C/T | 0.04    | 0.016    | 1     | 0.033    | -0.031   | 0.043    | 0.018   | 0.085    |
| 11:116662407 | chr11:116791691 | rs3135506   | APOA5    | Ser19Trp              | G/C | 0.059   | 0.053    | 0.999 | 0.088    | -0.12    | 0.13     | 0.048   | 0.24     |
| 11:116701354 | chr11:116830638 | rs138326449 | APOC3    | Essential_Splice_Site | G/A | 0.0018  | 0.0021   | 0.992 | -0.09    | 0.76     | -0.36    | -0.13   | -1.14    |
| 11:116707044 | chr11:116836328 | rs138407155 | APOA1    | Phe95Tyr              | A/T | 0.00065 | 0.0006   | 1     | -0.038   | -0.45    | 0.12     | 0.0058  | 0.23     |
| 11:116707739 | chr11:116837023 | rs199759119 | APOA1    | Ser60Ala              | A/C | 0.00045 | 0.000021 | 0.93  | -0.25    | -0.42    | -0.096   | -0.11   | -0.097   |
| 11:116896155 | chr11:117025439 | rs10892063  | SIK3     | Intron                | A/C | 0.58    | 0.63     | 1     | -0.036   | -0.018   | -0.029   | -0.0063 | -0.058   |
| 11:117299414 | chr11:117428698 | rs145244816 | DSCAML1  | Arg1991Gln            | C/T | 0.00024 | 3.2E-06  | 0.994 | 0.027    | 0.45     | -0.13    | 0.11    | -0.61    |
| 11:122522375 | chr11:122651667 | rs7941030   | IL6R     | Intergenic            | T/C | 0.38    | 0.41     | 1     | 0.019    | 0.024    | 0.01     | 0.014   | -0.00099 |
| 11:126160826 | chr11:126290931 | rs8177399   | TIRAP    | Arg13Trp              | C/T | 0.018   | 0.016    | 1     | 0.042    | -0.05    | 0.059    | 0.061   | 0.022    |
| 11:126243952 | chr11:126374057 | rs11220462  | ST3GAL4  | Intron                | G/A | 0.15    | 0.10     | 1     | 0.029    | -0.021   | 0.036    | 0.043   | 0.0057   |
| 11:14852490  | chr11:14830944  | rs1037378   | PDE3B    | Intron                | G/A | 0.54    | 0.47     | 1     | -0.0019  | -0.015   | 0.0035   | -0.0018 | 0.0076   |
| 11:18645843  | chr11:18624296  | rs11024739  | SPTY2D1  | Intron                | C/A | 0.68    | 0.68     | 1     | 0.025    | 0.0043   | 0.023    | 0.025   | 0.0088   |
| 11:2936952   | chr11:2915722   | rs16928809  | SLC22A18 | Intron                | G/A | 0.088   | 0.093    | 1     | -0.021   | -0.029   | -0.01    | -0.0086 | -0.00088 |
| 11:47270255  | chr11:47248704  | rs2167079   | ACP2     | Arg29Gln              | C/T | 0.35    | 0.35     | 1     | 0.0061   | 0.041    | -0.0085  | -0.001  | -0.02    |
| 11:47290147  | chr11:47268596  | rs61731956  | NR1H3    | Arg370Gln             | G/A | 0.00029 | 0.000056 | 0.924 | 0.03     | 0.47     | -0.14    | -0.16   | -0.31    |
| 11:47663049  | chr11:47641497  | rs10838738  | MTCH2    | Intron                | A/G | 0.33    | 0.35     | 1     | -0.016   | -0.032   | -0.0043  | -0.0046 | 0.0076   |
| 11:61571478  | chr11:61804006  | rs174550    | FADS1    | Intron                | T/C | 0.31    | 0.38     | 1     | -0.047   | -0.042   | -0.031   | -0.053  | 0.052    |
| 11:64031241  | chr11:64263769  | rs35169799  | PLCB3    | Ser778Leu             | C/T | 0.06    | 0.046    | 0.999 | 0.0043   | -0.039   | 0.018    | 0.0058  | 0.038    |
| 11:65391317  | chr11:65623846  | rs12801636  | PCNXL3   | Intron                | G/A | 0.23    | 0.24     | 1     | 0.0032   | 0.012    | -0.0011  | 0.0076  | -0.018   |
| 11:66297363  | chr11:66529892  | rs3816492   | BBS1     | Leu472Leu             | C/T | 0.23    | 0.23     | 1     | -0.018   | -0.00035 | -0.017   | -0.018  | -0.0039  |
| 11:68703959  | chr11:68936491  | rs622082    | IGHMBP2  | Thr671Ala             | A/G | 0.31    | 0.33     | 1     | -0.00086 | -0.017   | 0.0052   | 0.00035 | 0.014    |
| 11:75455021  | chr11:75743976  | rs499974    | ASAP3    | Intergenic            | C/A | 0.18    | 0.18     | 1     | -0.014   | -0.026   | -0.0045  | -0.0021 | -0.0089  |
| 12:107174646 | chr12:106780868 | rs10861661  | RIC8B    | Intron                | A/C | 0.23    | 0.18     | 1     | 0.0023   | -0.017   | 0.0083   | 0.00086 | 0.019    |
| 12:109661672 | chr12:109223867 | rs149793040 | ACACB    | Tyr1282Cys            | A/G | 0.00091 | 0.000051 | 0.952 | -0.035   | 0.23     | -0.12    | -0.084  | -0.22    |
| 12:109937534 | chr12:109499729 | rs7298565   | UBE3B    | Arg346Gln             | G/A | 0.53    | 0.51     | 1     | 0.018    | 0.03     | 0.007    | 0.0059  | 0.0027   |
| 12:111884608 | chr12:111446804 | rs3184504   | SH2B3    | Trp262Arg             | T/C | 0.57    | 0.61     | 1     | 0.033    | 0.027    | 0.023    | 0.027   | -0.011   |
| 12:121416650 | chr12:120978847 | rs1169288   | HNF1A    | Ile27Leu              | A/C | 0.33    | 0.30     | 0.999 | 0.037    | 0.014    | 0.031    | 0.037   | 0.0023   |
| 12:123200768 | chr12:122716221 | rs1798192   | GPR109B  | Thr173Pro             | T/G | 0.56    | 0.50     | 1     | 0.0031   | 0.022    | -0.0048  | -0.0023 | -0.01    |
| 12:123345509 | chr12:122860962 | rs34149579  | HIP1R    | Cys938Phe             | G/T | 0.042   | 0.025    | 0.995 | -0.015   | -0.039   | -0.00088 | -0.004  | 0.014    |
| 12:124427306 | chr12:123942759 | rs11057401  | CCDC92   | Ser70Cys              | T/A | 0.30    | 0.31     | 1     | -0.0023  | 0.033    | -0.014   | -0.0059 | -0.028   |
| 12:125261593 | chr12:124777047 | rs838880    | IL6R     | Intergenic            | C/T | 0.63    | 0.65     | 0.998 | -0.013   | -0.029   | -0.0025  | -0.0014 | -0.0013  |
| 12:125298855 | chr12:124814309 | rs187831231 | SCARB1   | Thr175Ala             | T/C | 0.00016 | 0.000019 | 1     | 0.19     | 0.61     | -0.03    | 0.014   | -0.028   |
| 12:125299542 | chr12:124814996 | rs5891      | SCARB1   | Val135Ile             | C/T | 0.013   | 0.012    | 0.997 | 0.022    | 0.066    | -0.0018  | 0.0041  | -0.0034  |
| 12:125307053 | chr12:124822507 | rs11057830  | SCARB1   | Intron                | G/A | 0.15    | 0.12     | 0.998 | 0.024    | -0.011   | 0.027    | 0.023   | 0.015    |
| 12:20473758  | chr12:20320824  | rs7134375   | FCRL2    | Intergenic            | C/A | 0.41    | 0.45     | 0.999 | 0.0027   | 0.021    | -0.0048  | 0.0033  | -0.014   |
| 12:21331549  | chr12:21178615  | rs4149056   | SLCO1B1  | Val174Ala             | T/C | 0.14    | 0.16     | 1     | 0.0029   | 0.0041   | 0.0014   | -0.0082 | 0.029    |
| 12:57809456  | chr12:57415673  | rs1106766   | CFH      | Intergenic            | C/T | 0.21    | 0.31     | 1     | -0.011   | 0.032    | -0.022   | -0.013  | -0.03    |
| 12:72179446  | chr12:71785666  | rs61754230  | RAB21    | Ser224Phe             | C/T | 0.015   | 0.016    | 0.992 | 0.04     | -0.01    | 0.043    | 0.057   | -0.0029  |
| 12:7691134   | chr12:7538538   | rs7136716   | AVPR1B   | Intergenic            | A/G | 0.15    | 0.13     | 1     | -0.00012 | 0.021    | -0.0076  | -0.0061 | -0.0079  |
| 12:9082581   | chr12:8929985   | rs4883201   | PHC1     | Intron                | A/G | 0.12    | 0.12     | 1     | -0.029   | -0.03    | -0.018   | -0.022  | 0.0016   |
| 13:114527838 | chr13:113824865 | rs7400722   | GAS6     | Intron                | G/A | 0.42    | 0.41     | 0.999 | 0.016    | 0.00055  | 0.015    | 0.011   | 0.015    |

|              |                 |             |          |            |     |         |          |       |           |           |          |           |          |
|--------------|-----------------|-------------|----------|------------|-----|---------|----------|-------|-----------|-----------|----------|-----------|----------|
| 13:32953388  | chr13:32379251  | rs4942486   | BRCA2    | Intron     | T/C | 0.52    | 0.54     | 1     | -0.019    | 0.0094    | -0.022   | -0.022    | -0.0085  |
| 13:45970147  | chr13:45396012  | rs138358301 | SLC25A30 | Phe280Leu  | A/G | 0.0036  | 0.0017   | 0.993 | 0.048     | -0.019    | 0.054    | 0.00079   | 0.15     |
| 13:51221618  | chr13:50647482  | rs797486    | ADAR     | Intergenic | C/A | 0.87    | 0.85     | 1     | 0.0036    | -0.017    | 0.0095   | 0.0044    | 0.02     |
| 14:105277209 | chr14:104810872 | rs4983559   | CYB561D1 | Intergenic | G/A | 0.57    | 0.59     | 0.992 | -0.0072   | -0.027    | 0.0025   | -0.0023   | 0.0071   |
| 14:24883887  | chr14:24414681  | rs8017377   | NYNRIN   | Ala978Thr  | G/A | 0.42    | 0.49     | 0.999 | 0.022     | 0.0027    | 0.021    | 0.023     | 0.0037   |
| 14:64235556  | chr14:63768838  | rs7157785   | NPR1     | Intergenic | G/T | 0.18    | 0.15     | 0.999 | 0.015     | -0.013    | 0.019    | 0.011     | 0.023    |
| 14:65914867  | chr14:65448149  | rs10483776  | FUT8     | Intron     | A/G | 0.16    | 0.13     | 1     | -0.0043   | -0.02     | 0.0029   | -0.0018   | 0.013    |
| 14:71096344  | chr14:70629627  | rs9646133   | FLAD1    | Intergenic | G/T | 0.33    | 0.30     | 0.998 | -0.013    | 0.0089    | -0.016   | -0.019    | -0.00043 |
| 14:74250126  | chr14:73783423  | rs13379043  | C14orf43 | Intron     | T/C | 0.30    | 0.24     | 0.999 | -0.01     | 0.017     | -0.016   | -0.018    | -0.0086  |
| 14:75322794  | chr14:74856091  | rs8014204   | PROX2    | Intron     | G/A | 0.57    | 0.48     | 1     | 0.015     | 0.0082    | 0.012    | 0.012     | -0.0027  |
| 14:94844947  | chr14:94378610  | rs28929474  | SERPINA1 | Glu366Lys  | C/T | 0.015   | 0.008    | 0.999 | 0.078     | -0.017    | 0.082    | 0.081     | 0.021    |
| 15:40751555  | chr15:40459356  | rs3803357   | BAHD1    | Gln298Lys  | C/A | 0.54    | 0.50     | 1     | -0.0012   | 0.0099    | -0.0047  | 0.00042   | -0.017   |
| 15:43820717  | chr15:43528519  | rs55707100  | MAP1A    | Pro2349Leu | C/T | 0.024   | 0.027    | 1     | 0.025     | -0.1      | 0.06     | 0.0074    | 0.13     |
| 15:58678512  | chr15:58386313  | rs10468017  | SNX27    | Intergenic | C/T | 0.27    | 0.30     | 1     | 0.048     | 0.11      | 0.008    | 0.0033    | 0.034    |
| 15:58723675  | chr15:58431476  | rs1800588   | SNX27    | Intergenic | C/T | 0.24    | 0.19     | 1     | 0.056     | 0.12      | 0.012    | 0.00096   | 0.047    |
| 15:63414083  | chr15:63121884  | rs34317102  | LACTB    | Met5Leu    | A/C | 0.76    | 0.71     | 1     | -4.00E-04 | 0.019     | -0.0071  | 0.0015    | -0.015   |
| 16:15129970  | chr16:15036113  | rs7200543   | PDXDC1   | Leu736Leu  | A/G | 0.30    | 0.26     | 1     | -0.0016   | -0.019    | 0.0052   | -0.00032  | 0.024    |
| 16:30936081  | chr16:30924760  | rs35675346  | FBXL19   | Glu10Lys   | G/A | 0.25    | 0.22     | 1     | 0.016     | -9.30E-05 | 0.016    | 0.012     | 0.0089   |
| 16:4755108   | chr16:4705107   | rs78074706  | ANKS3    | Arg286Trp  | G/A | 0.022   | 0.02     | 1     | -0.0037   | -0.053    | 0.015    | 0.0084    | 0.027    |
| 16:53800954  | chr16:53767042  | rs1421085   | FTO      | Intron     | T/C | 0.39    | 0.41     | 1     | 0.00037   | -0.022    | 0.0082   | 0.0023    | 0.019    |
| 16:56904587  | chr16:56870675  | rs1529927   | SLC12A3  | Ala263Gly  | C/G | 0.97    | 0.94     | 0.999 | 0.018     | 0.094     | -0.016   | -0.017    | -0.017   |
| 16:56985139  | chr16:56951227  | rs9989419   | OR10K2   | Intergenic | A/G | 0.60    | 0.60     | 0.997 | 0.027     | 0.13      | -0.02    | -0.014    | -0.019   |
| 16:56989590  | chr16:56955678  | rs247616    | OR10K2   | Intergenic | C/T | 0.31    | 0.32     | 0.998 | 0.044     | 0.24      | -0.042   | -0.032    | -0.036   |
| 16:56995935  | chr16:56962023  | rs34065661  | CETP     | Ala15Gly   | C/G | 0.0048  | 6.4E-06  | 1     | 0.093     | 0.43      | -0.061   | -0.055    | -0.077   |
| 16:57002732  | chr16:56968820  | rs9939224   | CETP     | Intron     | T/G | 0.79    | 0.77     | 0.999 | 0.04      | 0.2       | -0.032   | -0.023    | -0.034   |
| 16:57015091  | chr16:56981179  | rs5880      | CETP     | Ala390Pro  | G/C | 0.048   | 0.06     | 0.999 | -0.06     | -0.26     | 0.033    | 0.017     | 0.039    |
| 16:57016092  | chr16:56982180  | rs5882      | CETP     | Val422Ile  | G/A | 0.65    | 0.67     | 0.999 | -0.025    | -0.092    | 0.0081   | 0.0055    | 0.0068   |
| 16:57017292  | chr16:56983380  | rs2303790   | CETP     | Asp459Gly  | A/G | 0.00077 | 0.000017 | 0.916 | 0.035     | 0.37      | -0.097   | -0.051    | -0.16    |
| 16:67928042  | chr16:67894139  | rs16942887  | PSKH1    | Intron     | G/A | 0.13    | 0.10     | 1     | 0.024     | 0.08      | -0.0048  | 0.0012    | -0.016   |
| 16:67976320  | chr16:67942417  | rs4986970   | LCAT     | Ser232Thr  | A/T | 0.025   | 0.028    | 0.997 | -0.026    | -0.091    | 0.0068   | 0.0052    | 0.014    |
| 16:72108093  | chr16:72074194  | rs2000999   | HPR      | Intron     | G/A | 0.20    | 0.15     | 1     | 0.058     | -0.007    | 0.059    | 0.063     | 0.021    |
| 16:72162966  | chr16:72129067  | rs34832584  | PMFBP1   | Thr650Lys  | G/T | 0.16    | 0.13     | 1     | 0.02      | 0.003     | 0.019    | 0.02      | 0.0026   |
| 16:81534790  | chr16:81501185  | rs2925979   | CMIP     | Intron     | T/C | 0.70    | 0.70     | 1     | 0.003     | 0.041     | -0.012   | -0.003    | -0.029   |
| 16:88580796  | chr16:88514388  | rs147032017 | ZFPM1    | Asp91Asp   | C/T | 0.0064  | 0.00069  | 0.998 | -0.083    | -0.04     | -0.067   | -0.091    | 0.012    |
| 17:17409560  | chr17:17506246  | rs7946      | PEMT     | Val212Met  | C/T | 0.67    | 0.70     | 1     | -1.10E-02 | 0.0046    | -0.012   | -0.0072   | -0.016   |
| 17:26694861  | chr17:28367840  | rs704       | VTN      | Thr400Met  | G/A | 0.49    | 0.50     | 1     | 0.015     | -0.01     | 0.018    | 0.021     | -0.0063  |
| 17:29629326  | chr17:31302308  | rs11080150  | NF1      | Intron     | A/G | 0.33    | 0.30     | 1     | -0.02     | -0.0023   | -0.019   | -1.90E-02 | -0.0025  |
| 17:37813856  | chr17:39657603  | rs11869286  | STARD3   | Intron     | G/C | 0.63    | 0.66     | 1     | 0.013     | 3.00E-02  | 0.0021   | 0.0029    | -0.0025  |
| 17:40257163  | chr17:42105145  | rs2074158   | DHX58    | Gln425Arg  | T/C | 0.19    | 0.16     | 1     | -0.0075   | -0.02     | -0.00026 | 0.00084   | -0.0027  |
| 17:41926126  | chr17:43848758  | rs72836561  | CD300LG  | Arg82Cys   | C/T | 0.028   | 0.033    | 0.999 | -0.039    | -0.17     | 0.022    | -0.027    | 0.13     |
| 17:41931375  | chr17:43854007  | rs12453522  | CD300LG  | Thr194Ala  | A/G | 0.18    | 0.14     | 1     | 0.0073    | -0.014    | 0.012    | -0.00051  | 0.021    |
| 17:45732774  | chr17:47655408  | rs11871606  | KPNB1    | Intron     | C/A | 0.5     | 0.41     | 1     | -0.024    | -0.013    | -0.019   | -0.027    | 0.016    |
| 17:4692559   | chr17:4789264   | rs2304969   | GLTPD2   | Val49Phe   | G/T | 0.18    | 0.14     | 0.998 | -0.02     | -0.0024   | -0.019   | -0.014    | -0.016   |
| 17:46022065  | chr17:47944699  | rs17679445  | PNPO     | Arg116Gln  | G/A | 0.063   | 0.07     | 1     | 0.017     | 0.03      | 0.006    | 0.018     | -0.027   |
| 17:64210580  | chr17:66214462  | rs1801689   | APOH     | Cys325Gly  | A/C | 0.027   | 0.01     | 0.992 | 0.069     | -0.019    | 0.074    | 0.1       | -0.047   |
| 17:65903006  | chr17:67906890  | rs12947658  | BPTF     | Intron     | A/G | 0.66    | 0.69     | 1     | -0.014    | 0.012     | -0.018   | -0.011    | -0.02    |
| 17:67081278  | chr17:69085137  | rs77542162  | ABCA6    | Cys1359Arg | A/G | 0.015   | 0.025    | 0.999 | 0.15      | -0.022    | 0.15     | 0.19      | -0.037   |
| 17:7091650   | chr17:7188331   | rs314253    | CRB1     | Intergenic | T/C | 0.35    | 0.34     | 0.997 | -0.02     | -8.70E-05 | -0.02    | -0.02     | -0.0056  |



|             |                |             |           |            |     |        |        |       |           |           |          |          |         |
|-------------|----------------|-------------|-----------|------------|-----|--------|--------|-------|-----------|-----------|----------|----------|---------|
| 17:73782191 | chr17:75786110 | rs2125345   | UNK       | Intron     | T/C | 0.31   | 0.28   | 1     | -0.018    | 0.0075    | -0.02    | -0.024   | -0.011  |
| 17:7484101  | chr17:7580783  | rs9901673   | CD68      | Gln254Lys  | C/A | 0.16   | 0.18   | 1     | -0.021    | -0.011    | -0.017   | -0.017   | -0.011  |
| 17:76395430 | chr17:78399349 | rs2292642   | PGS1      | Gly172Gly  | C/T | 0.61   | 0.60   | 1     | 0.013     | 0.028     | 0.0028   | 0.013    | -0.02   |
| 17:8216468  | chr17:8313150  | rs871841    | ARHGGEF15 | Leu277Pro  | T/C | 0.52   | 0.46   | 0.999 | 0.015     | 0.0029    | 0.014    | 0.014    | 0.007   |
| 18:47109955 | chr18:49583585 | rs77960347  | LIPG      | Asn396Ser  | A/G | 0.011  | 0.012  | 1     | 0.18      | 0.26      | 0.084    | 0.083    | 0.051   |
| 18:47113165 | chr18:49586795 | rs117623631 | LIPG      | Arg476Trp  | C/T | 0.0019 | 0.0008 | 0.984 | 0.28      | 0.43      | 0.12     | 0.078    | 0.1     |
| 18:47160953 | chr18:49634583 | rs7241918   | MTHFR     | Intergenic | G/T | 0.85   | 0.79   | 1     | 0.048     | 0.077     | 0.02     | 0.02     | 0.0064  |
| 18:56109859 | chr18:58442627 | rs8099014   | VPS13D    | Intergenic | C/A | 0.71   | 0.72   | 1     | -0.0029   | 0.015     | -0.0081  | -0.0041  | -0.0059 |
| 18:57882787 | chr18:60215554 | rs489693    | DVL1      | Intergenic | C/A | 0.32   | 0.33   | 1     | -0.00043  | -0.019    | 0.0063   | 0.0022   | 0.015   |
| 19:10229580 | chr19:10118904 | rs34658893  | EIF3G     | Thr69Thr   | T/C | 0.0054 | 0.0037 | 0.997 | -0.09     | -0.023    | -0.08    | -0.09    | 0.0016  |
| 19:11202306 | chr19:11091630 | rs6511720   | LDLR      | Intron     | G/T | 0.11   | 0.087  | 0.998 | -0.18     | 0.024     | -0.18    | -0.21    | -0.0064 |
| 19:11222300 | chr19:11111624 | rs11669576  | LDLR      | Ala264Thr  | G/A | 0.052  | 0.042  | 0.999 | 0.05      | -0.00038  | 0.049    | 0.058    | 0.0027  |
| 19:11257018 | chr19:11146342 | rs11557092  | C1orf127  | Intergenic | T/C | 0.69   | 0.74   | 1     | 0.019     | -0.0097   | 0.022    | 0.024    | 0.008   |
| 19:11275139 | chr19:11164463 | rs7188      | KANK2     | Utr3       | A/C | 0.32   | 0.28   | 1     | 0.042     | -0.012    | 0.045    | 0.048    | 0.011   |
| 19:11347493 | chr19:11236817 | rs737337    | DOCK6     | Thr713Thr  | T/C | 0.12   | 0.086  | 1     | -0.036    | -0.058    | -0.015   | -0.016   | 0.0021  |
| 19:18304700 | chr19:18193890 | rs874628    | MPV17L2   | Met72Val   | A/G | 0.26   | 0.24   | 1     | 0.015     | 0.00053   | 0.014    | 0.015    | 0.0054  |
| 19:19379549 | chr19:19268740 | rs58542926  | TM6SF2    | Glu167Lys  | C/T | 0.074  | 0.076  | 1     | -0.13     | 0.015     | -0.13    | -0.1     | -0.12   |
| 19:32917455 | chr19:32426549 | rs2111504   | DPY19L3   | Intron     | T/A | 0.17   | 0.15   | 1     | -0.0015   | 0.02      | -0.0085  | -0.0075  | -0.012  |
| 19:33899065 | chr19:33408159 | rs731839    | PEPD      | Intron     | G/A | 0.63   | 0.68   | 1     | 0.004     | 0.017     | -0.0021  | 0.0012   | -0.015  |
| 19:45316588 | chr19:44813331 | rs28399654  | BCAM      | Val196Ile  | G/A | 0.027  | 0.029  | 0.997 | -0.17     | 0.051     | -0.18    | -0.27    | 0.073   |
| 19:45410002 | chr19:44906745 | rs769449    | APOE      | Intron     | G/A | 0.11   | 0.14   | 1     | 0.16      | -0.098    | 0.19     | 0.19     | 0.066   |
| 19:45412079 | chr19:44908822 | rs7412      | APOE      | Arg176Cys  | C/T | 0.075  | 0.058  | 1     | -0.37     | 0.098     | -0.4     | -0.54    | 0.12    |
| 19:45414451 | chr19:44911194 | rs439401    | ATP13A2   | Intergenic | T/C | 0.63   | 0.60   | 1     | 0.034     | -0.022    | 0.041    | 0.013    | 0.075   |
| 19:45448465 | chr19:44945208 | rs5167      | APOC4     | Leu96Arg   | T/G | 0.37   | 0.32   | 0.999 | 0.013     | 0.037     | -0.00037 | -0.0033  | 0.011   |
| 19:46181392 | chr19:45678134 | rs1800437   | GIPR      | Glu354Gln  | G/C | 0.20   | 0.22   | 0.999 | -0.019    | -1.20E-02 | -0.014   | -0.019   | 0.0055  |
| 19:46307406 | chr19:45804148 | rs8111071   | RSPH6A    | Intron     | A/G | 0.075  | 0.056  | 1     | -0.021    | -0.029    | -0.01    | -0.014   | 0.0024  |
| 19:47589895 | chr19:47086638 | rs2303108   | ZC3H4     | Intron     | T/C | 0.67   | 0.69   | 1     | 0.0024    | -0.015    | 0.0077   | 0.0067   | 0.011   |
| 19:49206417 | chr19:48703160 | rs492602    | FUT2      | Ala69Ala   | A/G | 0.45   | 0.59   | 0.999 | 0.03      | -0.0074   | 0.032    | 0.028    | 0.018   |
| 19:50000009 | chr19:49496752 | rs2280401   | RPS11     | Intron     | G/A | 0.15   | 0.20   | 0.999 | -0.022    | -0.0064   | -0.019   | -0.016   | -0.02   |
| 19:50038017 | chr19:49534760 | rs10419198  | RCN3      | Intron     | C/T | 0.30   | 0.20   | 0.999 | 0.02      | 0.0058    | 0.018    | 0.013    | 0.012   |
| 19:52324216 | chr19:51820963 | rs17695224  | FPR3      | Intron     | G/A | 0.25   | 0.27   | 1     | -0.0065   | -0.028    | 0.0035   | -0.0018  | 0.0075  |
| 19:54759361 | chr19:54255498 | rs12975366  | LILRB5    | Asp147Gly  | T/C | 0.38   | 0.40   | 0.999 | -0.013    | -0.029    | -0.0025  | -0.0056  | 0.002   |
| 19:54792761 | chr19:54288907 | rs386000    | SLC45A3   | Intergenic | G/C | 0.22   | 0.25   | 0.999 | 0.013     | 0.054     | -0.0064  | -0.00024 | -0.0082 |
| 19:7184762  | chr19:7184751  | rs891088    | INSR      | Intron     | A/G | 0.28   | 0.24   | 1     | -0.00064  | 0.015     | -0.0059  | 0.00066  | -0.017  |
| 19:7224431  | chr19:7224420  | rs7248104   | INSR      | Intron     | G/A | 0.40   | 0.43   | 1     | -0.0038   | 0.012     | -0.008   | -0.0023  | -0.02   |
| 19:7831628  | chr19:7766742  | rs2277998   | CLEC4M    | Asp263Asn  | G/A | 0.29   | 0.28   | 0.999 | 0.0094    | 0.016     | 0.0035   | 0.0063   | -0.0048 |
| 19:8429323  | chr19:8364439  | rs116843064 | ANGPTL4   | Glu40Lys   | G/A | 0.02   | 0.024  | 0.997 | -0.003    | 0.24      | -0.088   | -0.0038  | -0.27   |
| 19:8433196  | chr19:8368312  | rs7255436   | ANGPTL4   | Intron     | C/A | 0.52   | 0.56   | 1     | 0.011     | 0.029     | 0.0005   | 0.0076   | -0.019  |
| 20:12962718 | chr20:12982070 | rs364585    | DBT       | Intergenic | A/G | 0.64   | 0.54   | 1     | 0.016     | 0.0072    | 0.013    | 0.019    | -0.012  |
| 20:17596155 | chr20:17615510 | rs1132274   | RRBP1     | Arg891Leu  | C/A | 0.17   | 0.16   | 1     | 0.0079    | -0.02     | 0.015    | 0.019    | 0.0034  |
| 20:33488771 | chr20:34900968 | rs6120757   | ACSS2     | Intron     | C/T | 0.62   | 0.58   | 1     | -0.0039   | -0.017    | 0.0022   | 0.00025  | 0.005   |
| 20:34116282 | chr20:35528453 | rs7261862   | C20orf173 | Lys194Glu  | T/C | 0.18   | 0.11   | 1     | -0.024    | -0.0039   | -0.022   | -0.024   | -0.013  |
| 20:39154095 | chr20:40525455 | rs6016373   | SLC27A3   | Intergenic | A/G | 0.39   | 0.38   | 1     | -0.027    | 0.0037    | -0.028   | -0.024   | -0.0086 |
| 20:39672618 | chr20:41043978 | rs6029526   | TOP1      | Intron     | T/A | 0.51   | 0.45   | 1     | 0.038     | 0.0038    | 0.036    | 0.035    | 0.013   |
| 20:43042364 | chr20:44413724 | rs1800961   | HNF4A     | Thr117Ile  | C/T | 0.031  | 0.045  | 0.999 | -0.092    | -0.14     | -0.04    | -0.054   | 0.0043  |
| 20:44576502 | chr20:45947863 | rs7679      | PCIF1     | Utr3       | T/C | 0.17   | 0.22   | 1     | 0.0063    | -0.056    | 0.026    | 0.011    | 0.053   |
| 20:56140439 | chr20:57565383 | rs41302559  | PCK1      | Arg483Gln  | G/A | 0.0021 | 0.0085 | 0.999 | -3.20E-02 | 0.058     | -0.052   | -0.0067  | -0.15   |
| 20:62349586 | chr20:63718234 | rs4809330   | ZGPAT     | Intron     | A/G | 0.70   | 0.58   | 1     | -0.012    | -0.0089   | -0.0086  | -0.015   | 0.0037  |

|                                                                                                             |                |             |          |            |     |         |        |       |          |         |         |          |           |
|-------------------------------------------------------------------------------------------------------------|----------------|-------------|----------|------------|-----|---------|--------|-------|----------|---------|---------|----------|-----------|
| 20:62695931                                                                                                 | chr20:64064578 | rs6062343   | TCEA2    | Intron     | G/A | 0.43    | 0.42   | 1     | -0.012   | 0.013   | -0.016  | -0.014   | -0.018    |
| 21:46875817                                                                                                 | chr21:45455903 | rs200559406 | COL18A1  | Val125Ile  | G/A | 0.00087 | 0.0016 | 0.974 | 0.083    | -0.22   | 0.16    | 0.072    | 0.3       |
| 22:17625915                                                                                                 | chr22:17145025 | rs35665085  | CECR5    | Thr149Met  | G/A | 0.05    | 0.078  | 0.996 | 0.022    | 0.0039  | 0.02    | 0.0092   | 0.032     |
| 22:21932068                                                                                                 | chr22:21577779 | rs181362    | UBE2L3   | Intron     | C/T | 0.25    | 0.20   | 1     | -0.02    | -0.028  | -0.0097 | -0.0073  | -0.013    |
| 22:29451671                                                                                                 | chr22:29055683 | rs4823006   | ZNRF3    | Utr3       | A/G | 0.45    | 0.42   | 1     | -0.003   | 0.014   | -0.0079 | -0.005   | -0.012    |
| 22:30776095                                                                                                 | chr22:30380106 | rs5749088   | RNF215   | Ala322Thr  | C/T | 0.21    | 0.21   | 1     | -0.018   | -0.0071 | -0.015  | -0.013   | -0.0031   |
| 22:30888494                                                                                                 | chr22:30492507 | rs17738527  | SEC14L4  | Glu211Lys  | C/T | 0.20    | 0.21   | 1     | -0.017   | -0.018  | -0.01   | -0.011   | -8.40E-05 |
| 22:35711098                                                                                                 | chr22:35315105 | rs138777    | TOM1     | Intron     | A/G | 0.62    | 0.58   | 1     | -0.019   | -0.0026 | -0.018  | -0.015   | -0.0077   |
| 22:38569006                                                                                                 | chr22:38172999 | rs738322    | PLA2G6   | Intron     | A/G | 0.49    | 0.45   | 1     | -0.00097 | 0.02    | -0.008  | -0.0016  | -0.02     |
| 22:38898051                                                                                                 | chr22:38502046 | rs138457    | DDX17    | Intron     | T/C | 0.62    | 0.65   | 1     | 0.00043  | 0.017   | -0.0056 | 0.00016  | -0.014    |
| 22:41170063                                                                                                 | chr22:40774059 | rs2076674   | SLC25A17 | Intron     | T/C | 0.35    | 0.32   | 1     | 0.014    | 0.0019  | 0.013   | 0.018    | -0.002    |
| 22:44324727                                                                                                 | chr22:43928847 | rs738409    | PNPLA3   | Ile149Met  | C/G | 0.23    | 0.23   | 1     | -0.029   | -0.012  | -0.024  | -0.018   | -0.018    |
| 22:45996298                                                                                                 | chr22:45600418 | rs13268     | FBLN1    | His695Arg  | A/G | 0.022   | 0.027  | 0.997 | -0.043   | -0.0049 | -0.04   | -0.053   | -0.00064  |
| 22:46627603                                                                                                 | chr22:46231706 | rs4253772   | PPARA    | Intron     | C/T | 0.098   | 0.09   | 1     | 0.025    | 0.0048  | 0.023   | 0.018    | 0.018     |
| 22:46627780                                                                                                 | chr22:46231883 | rs1042311   | PPARA    | Ala268Val  | C/T | 0.005   | 0.0017 | 0.987 | 0.12     | -0.0016 | 0.12    | 0.12     | 0.068     |
| 67 variants not used for calculation of the genetic scores due to pairwise $r^2 > 0.2$ with a variant above |                |             |          |            |     |         |        |       |          |         |         |          |           |
| 1:109818530                                                                                                 | chr1:109275908 | rs646776    | CELSR2   | Intergenic | C/T | 0.77    | 0.78   | 1     | 0.13     | -0.043  | 0.14    | 0.16     | 0.013     |
| 1:150958836                                                                                                 | chr1:150986360 | rs267733    | ANXA9    | Asp166Gly  | A/G | 0.14    | 0.15   | 1     | -0.019   | 0.021   | -0.026  | -0.025   | -0.0054   |
| 1:219700519                                                                                                 | chr1:219527177 | rs2785980   | LYPLAL1  | Intergenic | T/C | 0.31    | 0.35   | 1     | -0.0082  | 0.016   | -0.014  | -0.0079  | -0.016    |
| 1:230304988                                                                                                 | chr1:230169242 | rs10489615  | GALNT2   | Intron     | A/G | 0.57    | 0.62   | 0.999 | -0.0011  | 0.046   | -0.017  | -0.0021  | -0.039    |
| 1:39797055                                                                                                  | chr1:39331383  | rs16826069  | MACF1    | Ile39Val   | A/G | 0.21    | 0.23   | 1     | -0.0059  | -0.036  | 0.007   | -0.00044 | 0.025     |
| 2:118835841                                                                                                 | chr2:118078265 | rs10490626  | MTOR     | Intergenic | G/A | 0.069   | 0.069  | 1     | -0.047   | 0.0035  | -0.047  | -0.053   | -0.011    |
| 2:136555659                                                                                                 | chr2:135798089 | rs2322659   | LCT      | Asn1639Ser | T/C | 0.71    | 0.86   | 1     | -0.022   | -0.019  | -0.015  | -0.011   | 0.0046    |
| 2:165540800                                                                                                 | chr2:164684290 | rs12328675  | FLG      | Intergenic | T/C | 0.12    | 0.15   | 1     | 2.80E-05 | 0.05    | -0.018  | -0.0037  | -0.045    |
| 2:27550967                                                                                                  | chr2:27328100  | rs1049817   | GTF3C2   | Pro783Pro  | A/G | 0.41    | 0.42   | 1     | -0.022   | 0.0032  | -0.023  | -0.0056  | -0.056    |
| 2:27748624                                                                                                  | chr2:27525757  | rs1260333   | PTPN14   | Intergenic | A/G | 0.57    | 0.57   | 1     | -0.045   | 0.0096  | -0.047  | -0.02    | -0.095    |
| 5:156390297                                                                                                 | chr5:156963286 | rs6882076   | TIMD4    | Upstream   | T/C | 0.63    | 0.63   | 1     | 0.044    | -0.0016 | 0.044   | 0.039    | 0.038     |
| 5:74651084                                                                                                  | chr5:75355259  | rs3846662   | HMGCR    | Intron     | A/G | 0.48    | 0.39   | 0.999 | 0.062    | 0.006   | 0.059   | 0.065    | 0.0038    |
| 6:116325142                                                                                                 | chr6:116003979 | rs3756772   | FRK      | Gly122Arg  | C/T | 0.43    | 0.39   | 1     | 0.016    | 0.014   | 0.011   | 0.014    | 0.0015    |
| 6:160840252                                                                                                 | chr6:160419220 | rs7758229   | SLC22A3  | Intron     | G/T | 0.31    | 0.35   | 1     | 0.015    | -0.0097 | 0.018   | 0.016    | 0.018     |
| 6:16127407                                                                                                  | chr6:16127176  | rs3757354   | TRIM46   | Intergenic | C/T | 0.24    | 0.25   | 1     | -0.031   | 0.0031  | -0.031  | -0.033   | -0.003    |
| 6:30603519                                                                                                  | chr6:30635742  | rs9262130   | ATAT1    | Intron     | G/A | 0.091   | 0.084  | 1     | -0.029   | -0.031  | -0.017  | -0.0089  | -0.02     |
| 6:31379109                                                                                                  | chr6:31411332  | rs1051794   | MICA     | Glu196Lys  | G/A | 0.3     | 0.26   | 0.999 | 0.024    | 0.0089  | 0.02    | 0.021    | 0.003     |
| 6:31417191                                                                                                  | chr6:31449414  | rs3128982   | F5       | Intergenic | A/G | 0.28    | 0.29   | 0.999 | -0.013   | 0.00015 | -0.013  | -0.00038 | -0.027    |
| 6:31440082                                                                                                  | chr6:31472305  | rs1055569   | HCG26    | Exon       | C/T | 0.34    | 0.28   | 0.998 | 0.024    | 0.0063  | 0.021   | 0.019    | 0.009     |
| 6:31496949                                                                                                  | chr6:31529172  | rs78957773  | MCCD1    | Thr53Met   | C/T | 0.021   | 0.019  | 1     | 0.055    | -0.013  | 0.058   | 0.03     | 0.052     |
| 6:31600106                                                                                                  | chr6:31632329  | rs41273264  | PRRC2A   | Ser1219Tyr | C/A | 0.019   | 0.04   | 1     | 0.023    | -0.07   | 0.047   | 0.025    | 0.096     |
| 6:32261252                                                                                                  | chr6:32293475  | rs7775397   | C6orf10  | Glu317Ala  | T/G | 0.086   | 0.083  | 1     | -0.037   | -0.017  | -0.03   | -0.017   | -0.036    |
| 6:32586854                                                                                                  | chr6:32619077  | rs9271366   | PADI4    | Intergenic | G/A | 0.85    | 0.77   | 1     | 0.024    | 0.0061  | 0.021   | 0.018    | 0.024     |
| 6:32609105                                                                                                  | chr6:32641328  | rs1129740   | HLA-DQA1 | Cys34Tyr   | G/A | 0.58    | 0.48   | 1     | -0.018   | 0.016   | -0.023  | -0.019   | -0.02     |
| 6:43758873                                                                                                  | chr6:43791136  | rs6905288   | SH2D5    | Intergenic | G/A | 0.59    | 0.53   | 0.999 | 0.014    | -0.024  | 0.022   | 0.0096   | 0.033     |
| 7:1097183                                                                                                   | chr7:1057547   | rs11761941  | GPR146   | Gly11Glu   | G/A | 0.15    | 0.11   | 1     | 0.028    | 0.028   | 0.017   | 0.016    | 0.0083    |
| 7:130466854                                                                                                 | chr7:130782095 | rs972283    | SNX27    | Intergenic | A/G | 0.55    | 0.44   | 0.998 | 0.006    | -0.031  | 0.017   | 0.0065   | 0.027     |
| 7:72856269                                                                                                  | chr7:73441939  | rs2240466   | BAZ1B    | Intron     | G/A | 0.11    | 0.11   | 1     | -0.0092  | 0.043   | -0.024  | 0.014    | -0.12     |
| 7:72856430                                                                                                  | chr7:73442100  | rs1178979   | BAZ1B    | Intron     | T/C | 0.18    | 0.18   | 1     | -0.0081  | 0.035   | -0.02   | 0.012    | -0.096    |
| 8:126493746                                                                                                 | chr8:125481504 | rs2954033   | AMPD1    | Intergenic | A/G | 0.72    | 0.67   | 1     | -0.046   | 0.047   | -0.062  | -0.035   | -0.082    |
| 8:126507389                                                                                                 | chr8:125495147 | rs2954038   | AMPD1    | Intergenic | C/A | 0.72    | 0.67   | 0.999 | -0.052   | 0.048   | -0.068  | -0.042   | -0.087    |
| 8:18272438                                                                                                  | chr8:18414928  | rs4921914   | PGLYRP4  | Intergenic | C/T | 0.75    | 0.80   | 1     | -0.034   | -0.0041 | -0.032  | -0.022   | -0.035    |

|                                                                                                      |                 |             |          |            |     |          |        |       |          |         |         |           |         |
|------------------------------------------------------------------------------------------------------|-----------------|-------------|----------|------------|-----|----------|--------|-------|----------|---------|---------|-----------|---------|
| 8:19819439                                                                                           | chr8:19961928   | rs326       | LPL      | Intron     | A/G | 0.30     | 0.29   | 1     | -0.0014  | 0.11    | -0.04   | 0.00049   | -0.11   |
| 8:19819724                                                                                           | chr8:19962213   | rs328       | LPL      | Ser474Stp  | C/G | 0.098    | 0.085  | 1     | 0.0038   | 0.16    | -0.053  | 0.013     | -0.18   |
| 8:19824492                                                                                           | chr8:19966981   | rs13702     | LPL      | Utr3       | T/C | 0.29     | 0.28   | 1     | -0.0011  | 0.11    | -0.04   | 0.0011    | -0.12   |
| 8:19830921                                                                                           | chr8:19973410   | rs10096633  | GATAD2B  | Intergenic | C/T | 0.14     | 0.098  | 1     | 0.0041   | 0.14    | -0.046  | 0.0071    | -0.15   |
| 9:107647220                                                                                          | chr9:104884939  | rs4149268   | ABCA1    | Intron     | C/T | 0.38     | 0.33   | 1     | -0.031   | -0.034  | -0.018  | -0.015    | -0.014  |
| 9:136137065                                                                                          | chr9:133261662  | NA          | ABO      | Intron     | A/G | 0.37     | 0.27   | 1     | 0.044    | 0.015   | 0.038   | 0.043     | -0.002  |
| 10:113940329                                                                                         | chr10:112180571 | rs2792751   | GPAM     | Ile43Val   | T/C | 0.73     | 0.74   | 1     | -0.028   | -0.027  | -0.018  | -0.028    | 0.02    |
| 10:64927823                                                                                          | chr10:63168063  | rs1935      | JMJD1C   | Glu2299Asp | C/G | 0.48     | 0.52   | 1     | 0.011    | 0.012   | 0.0065  | 0.018     | -0.029  |
| 11:116633862                                                                                         | chr11:116763146 | rs11820589  | BUD13    | Pro148Leu  | G/A | 0.066    | 0.06   | 1     | 0.072    | -0.087  | 0.1     | 0.034     | 0.19    |
| 11:116639104                                                                                         | chr11:116768388 | rs10790162  | BUD13    | Intron     | A/G | 0.92     | 0.92   | 1     | -0.09    | 0.11    | -0.13   | -0.033    | -0.26   |
| 11:116648917                                                                                         | chr11:116778201 | rs964184    | PRAMEF2  | Intergenic | G/C | 0.85     | 0.86   | 1     | -0.087   | 0.11    | -0.12   | -0.037    | -0.25   |
| 11:116722041                                                                                         | chr11:116851325 | rs10047462  | SIK3     | Intron     | G/T | 0.86     | 0.86   | 1     | -0.044   | 0.023   | -0.051  | -0.01     | -0.11   |
| 11:117042408                                                                                         | chr11:117171692 | rs186808413 | PAFAH1B2 | Ser161Leu  | C/T | 0.0099   | 0.0091 | 0.997 | 0.01     | 0.2     | -0.061  | -0.033    | -0.18   |
| 11:18632984                                                                                          | chr11:18611437  | rs10128711  | SPTY2D1  | Intron     | T/C | 0.69     | 0.68   | 1     | 0.024    | 0.0032  | 0.022   | 0.025     | 0.0077  |
| 11:61569830                                                                                          | chr11:61802358  | rs174546    | FADS1    | Utr3       | C/T | 0.31     | 0.38   | 1     | -0.047   | -0.042  | -0.031  | -0.053    | 0.052   |
| 11:61570783                                                                                          | chr11:61803311  | rs174547    | FADS1    | Intron     | T/C | 0.31     | 0.38   | 1     | -0.047   | -0.042  | -0.031  | -0.053    | 0.052   |
| 12:121420807                                                                                         | chr12:120983004 | rs1183910   | HNF1A    | Intron     | G/A | 0.32     | 0.30   | 1     | 0.035    | 0.015   | 0.029   | 0.036     | 0.0012  |
| 12:121424861                                                                                         | chr12:120987058 | rs7310409   | HNF1A    | Intron     | A/G | 0.60     | 0.64   | 1     | -0.03    | -0.016  | -0.024  | -0.027    | -0.0011 |
| 15:43622265                                                                                          | chr15:43330067  | rs3742970   | LCMT2    | Arg142Ser  | C/A | 0.084    | 0.089  | 0.999 | 0.0068   | -0.027  | 0.016   | 0.0015    | 0.038   |
| 15:58683366                                                                                          | chr15:58391167  | rs1532085   | SNX27    | Intergenic | A/G | 0.59     | 0.58   | 1     | -0.042   | -0.096  | -0.0071 | 0.00017   | -0.031  |
| 16:15131962                                                                                          | chr16:15038105  | rs1135999   | NTAN1    | Ser287Pro  | A/G | 0.30     | 0.26   | 1     | -0.0014  | -0.019  | 0.0054  | -5.60E-05 | 0.024   |
| 16:56988044                                                                                          | chr16:56954132  | rs173539    | OR10K2   | Intergenic | C/T | 0.32     | 0.34   | 0.998 | 0.042    | 0.23    | -0.04   | -0.033    | -0.034  |
| 16:56993324                                                                                          | chr16:56959412  | rs3764261   | OR10K2   | Intergenic | C/A | 0.31     | 0.31   | 1     | 0.043    | 0.24    | -0.043  | -0.032    | -0.036  |
| 16:57006590                                                                                          | chr16:56972678  | rs7499892   | CETP     | Intron     | C/T | 0.19     | 0.19   | 0.999 | -0.041   | -0.23   | 0.041   | 0.029     | 0.04    |
| 16:67911517                                                                                          | chr16:67877614  | rs8060686   | EDC4     | Cys250Cys  | T/C | 0.20     | 0.14   | 1     | 0.022    | 0.056   | 0.0017  | 0.0043    | -0.01   |
| 16:69385641                                                                                          | chr16:69351738  | rs76116020  | TMED6    | Phe6Leu    | A/G | 0.033    | 0.025  | 1     | -0.026   | -0.041  | -0.011  | -0.013    | 0.0049  |
| 17:76403984                                                                                          | chr17:78407903  | rs4129767   | PGS1     | Intron     | G/A | 0.49     | 0.48   | 1     | 0.018    | 0.026   | 0.0084  | 0.017     | -0.017  |
| 18:57884750                                                                                          | chr18:60217517  | rs12970134  | DVL1     | Intergenic | G/A | 0.26     | 0.30   | 1     | 0.0014   | -0.019  | 0.0081  | 0.0041    | 0.017   |
| 19:33909710                                                                                          | chr19:33418804  | rs8182584   | PEPD     | Intron     | T/G | 0.59     | 0.64   | 1     | -0.00015 | 0.013   | -0.0047 | -0.00029  | -0.016  |
| 19:45395266                                                                                          | chr19:44892009  | rs157580    | TOMM40   | Intron     | G/A | 0.63     | 0.61   | 0.999 | 0.073    | -0.026  | 0.081   | 0.072     | 0.047   |
| 19:45415640                                                                                          | chr19:44912383  | rs445925    | ATP13A2  | Intergenic | G/A | 0.11     | 0.085  | 0.999 | -0.21    | 0.04    | -0.22   | -0.32     | 0.12    |
| 19:49232226                                                                                          | chr19:48728969  | rs2287922   | RASIP1   | Arg601Cys  | G/A | 0.47     | 0.60   | 1     | 0.029    | -0.0048 | 0.03    | 0.026     | 0.019   |
| 22:21982892                                                                                          | chr22:21628603  | rs2298428   | YDJC     | Ala263Thr  | C/T | 0.21     | 0.19   | 0.999 | -0.022   | -0.03   | -0.011  | -0.0087   | -0.015  |
| 22:35660875                                                                                          | chr22:35264882  | rs1053593   | HMGXB4   | Gly165Val  | G/T | 0.62     | 0.57   | 1     | -0.018   | -0.0014 | -0.017  | -0.016    | -0.0067 |
| 22:39100128                                                                                          | chr22:38704123  | rs5757251   | NPR1     | Intergenic | G/A | 0.39     | 0.34   | 1     | 0.0045   | -0.017  | 0.01    | 0.0043    | 0.016   |
| 32 variants not observed in the genotyped sample (n = 155 250) or with imputation information < 0.90 |                 |             |          |            |     |          |        |       |          |         |         |           |         |
| 1:55512222                                                                                           | chr1:55046549   | rs67608943  | PCSK9    | Tyr143Stp  | C/G | 0.00015  |        |       | -1.12    | -0.14   | -1      | -1.08     | -0.093  |
| 1:55512267                                                                                           | chr1:55046594   | rs143117125 | PCSK9    | Asn158Lys  | C/A | 4.60E-05 |        |       | -1.34    | 0.092   | -1.3    | -1.47     | -0.24   |
| 1:55524222                                                                                           | chr1:55058549   | rs141502002 | PCSK9    | Arg469Trp  | C/T | 0.00047  |        |       | 0.38     | -0.018  | 0.38    | 0.39      | 0.096   |
| 1:55529215                                                                                           | chr1:55063542   | rs28362286  | PCSK9    | Cys680Stp  | C/A | 0.00044  |        |       | -1.01    | 0.17    | -1      | -1.11     | -0.13   |
| 2:179309165                                                                                          | chr2:178444438  | rs75862065  | PRKRA    | Pro116Leu  | G/A | 0.29     |        |       | -0.0041  | 0.026   | -0.013  | -0.014    | -0.0059 |
| 2:21242613                                                                                           | chr2:21019741   | rs41288783  | APOB     | Pro994Leu  | G/A | 0.00065  |        |       | 0.47     | 0.075   | 0.43    | 0.56      | -0.18   |
| 6:27835293                                                                                           | chr6:27867515   | rs201148465 | HIST1H1B | Ala6Ala    | A/C | 0.0014   |        |       | 0.19     | 0.021   | 0.18    | 0.21      | 0.035   |
| 7:80285893                                                                                           | chr7:80656577   | rs144344249 | CD36     | Asn53Ser   | A/G | 0.001    |        |       | 0.063    | 0.22    | -0.016  | -0.0045   | -0.076  |
| 8:19811733                                                                                           | chr8:19954222   | rs118204057 | LPL      | Gly215Glu  | G/A | 0.00025  |        |       | 0.036    | -0.59   | 0.24    | 0.031     | 0.54    |
| 9:107593329                                                                                          | chr9:104831048  | rs137854496 | ABCA1    | Trp590Ser  | C/G | 8.60E-05 |        |       | -0.65    | -1.3    | -0.18   | -0.25     | -0.082  |
| 11:116661392                                                                                         | chr11:116790676 | rs2075291   | APOA5    | Gly185Cys  | C/A | 0.003    |        |       | 0.075    | -0.29   | 0.18    | -0.011    | 0.4     |
| 11:116701353                                                                                         | chr11:116830637 | rs76353203  | APOC3    | Arg19Stp   | C/T | 0.00044  |        |       | -0.067   | 0.88    | -0.38   | -0.13     | -1.22   |

|              |                 |             |                 |                       |     |          |          |       |        |        |         |         |         |
|--------------|-----------------|-------------|-----------------|-----------------------|-----|----------|----------|-------|--------|--------|---------|---------|---------|
| 11:116701560 | chr11:116830844 | rs147210663 | <i>APOC3</i>    | Ala43Thr              | G/A | 0.00039  | 7.7E-06  | 0.856 | -0.02  | 0.59   | -0.23   | -0.059  | -0.76   |
| 12:123796238 | chr12:123311691 | rs4759375   | <i>SBNO1</i>    | Intron                | C/T | 0.11     |          |       | 0.026  | 0.051  | 0.0074  | 0.01    | -0.0026 |
| 12:125284671 | chr12:124800125 | rs74830677  | <i>SCARB1</i>   | Pro376Leu             | G/A | 0.00033  |          |       | 0.36   | 0.57   | 0.15    | 0.065   | -0.052  |
| 15:58855748  | chr15:58563549  | rs113298164 | <i>LIPC</i>     | Thr405Met             | C/T | 0.0033   | 0.000045 | 0.874 | 0.13   | 0.33   | 0.01    | -0.031  | 0.12    |
| 16:67976823  | chr16:67942920  | rs199717050 | <i>LCAT</i>     | Arg123His             | C/T | 0.00023  |          |       | -0.26  | -0.70  | -0.0067 | -0.089  | 0.15    |
| 16:67976851  | chr16:67942948  | rs35673026  | <i>LCAT</i>     | Val114Met             | C/T | 0.00029  |          |       | 0.21   | 0.65   | -0.025  | 0.063   | -0.25   |
| 16:68013570  | chr16:67979667  | rs200922436 | <i>DPEP3</i>    | Arg154Lys             | C/T | 0.0017   |          |       | -0.07  | -0.23  | 0.013   | -0.0017 | 0.081   |
| 18:47091686  | chr18:49565316  | rs200435657 | <i>LIPG</i>     | Essential_Splice_Site | G/A | 0.00018  |          |       | 0.52   | 0.76   | 0.24    | 0.23    | 0.12    |
| 18:47095862  | chr18:49569492  | rs201922257 | <i>LIPG</i>     | Ala172Val             | C/T | 0.00021  |          |       | 0.36   | 0.61   | 0.14    | 0.17    | -0.025  |
| 18:47101838  | chr18:49575468  | rs142545730 | <i>LIPG</i>     | Arg224His             | G/A | 0.00032  |          |       | 0.18   | 0.38   | 0.042   | 0.066   | -0.049  |
| 19:10415795  | chr19:10305119  | rs200547722 | <i>ZGLP1</i>    | Val263Gly             | A/C | 0.00052  |          |       | 0.39   | 0.059  | 0.36    | 0.34    | 0.054   |
| 19:11213450  | chr19:11102774  | rs144172724 | <i>LDLR</i>     | Glu101Lys             | G/A | 3.30E-05 |          |       | 1.24   | -0.044 | 1.2     | 1.34    | 0.0016  |
| 19:11215907  | chr19:11105231  | rs140807148 | <i>LDLR</i>     | Cys68Arg              | T/C | 6.70E-06 |          |       | 2.95   | -0.43  | 3       | 3.08    | 0.4     |
| 19:11217344  | chr19:11106668  | rs139043155 | <i>LDLR</i>     | Asp140Glu             | T/A | 3.50E-05 |          |       | 1.45   | -0.24  | 1.5     | 1.64    | -0.0027 |
| 19:11224296  | chr19:11113620  | rs139624145 | <i>LDLR</i>     | Asp355Asn             | G/A | 3.00E-05 |          |       | 1.37   | 0.02   | 1.3     | 1.67    | -0.35   |
| 19:11231112  | chr19:11120436  | rs28942084  | <i>LDLR</i>     | Pro517Leu             | C/T | 2.70E-05 |          |       | 1.45   | -0.45  | 1.6     | 1.69    | -0.49   |
| 19:11350874  | chr19:11240198  | rs145464906 | <i>LOC55908</i> | Gln121Stp             | C/T | 0.00068  |          |       | -0.026 | 0.43   | -0.18   | -0.059  | -0.35   |
| 19:42584958  | chr19:42080806  | rs201596848 | <i>ZNF574</i>   | Arg734Cys             | C/T | 0.0014   |          |       | -0.16  | 0.09   | -0.19   | -0.26   | -0.043  |
| 19:45412040  | chr19:44908783  | rs769455    | <i>APOE</i>     | Arg163Cys             | C/T | 0.0013   |          |       | -0.17  | -0.11  | -0.13   | -0.32   | 0.35    |
| 21:46875775  | chr21:45455861  | rs114139997 | <i>COL18A1</i>  | Gly111Arg             | G/A | 0.0011   |          |       | -0.087 | 0.14   | -0.13   | -0.08   | -0.37   |

Abbreviations: TC, total cholesterol; HDL-C, high-density lipoprotein cholesterol; LDL-C, low-density lipoprotein cholesterol; TG, triglycerides.

<sup>a</sup> Reported<sup>b</sup> effect sizes (in standard deviations, estimated on inverted-normal transformed residuals) for TC, HDL-C, LDL-C and TG. Effect sizes for non-HDL-C were calculated using the formula: nonHDL-C effect = 0.979 × TC effect – 0.354 × HDL-C effect (see **Methods** for details)

eTable 2: Relationship of Genetic Scores with Their Respective Lipid Traits

| Genetic score       | n      | Effect on the respective lipid trait (95% CI) | Variance explained (R <sup>2</sup> ) |
|---------------------|--------|-----------------------------------------------|--------------------------------------|
| non-HDL cholesterol | 93 556 | 0.964 (0.948–0.980) mmol/L                    | 12.8%                                |
| LDL cholesterol     | 87 212 | 0.841 (0.827–0.855) mmol/L                    | 13.1%                                |
| HDL cholesterol     | 93 746 | 0.272 (0.267–0.277) mmol/L                    | 11.3%                                |
| Triglycerides       | 94 242 | 42.8 (42.0–43.7) %                            | 8.9%                                 |

Results from linear regression using adjusted residuals of each lipid trait (described in **eMethods**) as the response variable and the respective genetic score as the independent variable. Effects are given for a 1 unit increase in the respective genetic score. Effects for cholesterol traits are presented in units of mmol/L. The effect for triglyceride levels is presented as percentage change, obtained using a transformation of the  $\beta$  coefficient for adjusted residuals of  $\log_e$ -transformed values [ $100 \times (e^{\beta}-1)$ ]. To convert from mmol/L to mg/dL, multiply by 38.7.

eTable 3: Pairwise-Correlations for Genetic Scores (Blue) and Lipid Traits (Green)

|                     | non-HDL cholesterol | LDL cholesterol | HDL cholesterol | Triglycerides |
|---------------------|---------------------|-----------------|-----------------|---------------|
| non-HDL cholesterol |                     | +0.92           | -0.24           | +0.48         |
| LDL cholesterol     | +0.95               |                 | -0.098          | +0.19         |
| HDL cholesterol     | -0.32               | -0.18           |                 | -0.47         |
| Triglycerides       | +0.49               | +0.20           | -0.48           |               |

Pearson correlation coefficients,  $r$ .  
 Blue boxes show pair-wise correlation between the genetic scores in 155 250 genotyped individuals.  
 Green boxes show pairwise correlation between lipid traits (adjusted residuals, **eMethods**) in 87 212 genotyped individuals with available measurements for each lipid trait.

eTable 4. Genetic Scores for Lipid Levels and Angiographic Extent of CAD

| Genetic Score | Covariates (Genetic Scores) <sup>a</sup> | Overall Sample (n = 12 460) |                       | Patients with Obstructive CAD (n = 8984) |                      |                     |                      |
|---------------|------------------------------------------|-----------------------------|-----------------------|------------------------------------------|----------------------|---------------------|----------------------|
|               |                                          | Obstructive CAD             |                       | Multivessel Disease                      |                      | 3-Vessel Disease    |                      |
|               |                                          | Odds Ratio (95% CI)         | P Value               | Odds Ratio (95% CI)                      | P Value              | Odds Ratio (95% CI) | P Value              |
| non-HDL-C     | -                                        | 1.80 (1.60–2.02)            | 1.0×10 <sup>-22</sup> | 1.25 (1.10–1.42)                         | 6.3×10 <sup>-4</sup> | 1.46 (1.25–1.70)    | 1.1×10 <sup>-6</sup> |
|               | HDL-C                                    | 1.72 (1.52–1.94)            | 4.8×10 <sup>-18</sup> | 1.25 (1.10–1.43)                         | 9.0×10 <sup>-4</sup> | 1.45 (1.23–1.70)    | 5.5×10 <sup>-6</sup> |
|               | HDL-C + triglycerides                    | 1.73 (1.51–1.99)            | 1.8×10 <sup>-15</sup> | 1.30 (1.12–1.51)                         | 5.0×10 <sup>-4</sup> | 1.43 (1.20–1.71)    | 7.6×10 <sup>-5</sup> |
| LDL-C         | LDL-C                                    | 1.96 (1.36–2.82)            | 3.0×10 <sup>-4</sup>  | 0.97 (0.66–1.44)                         | 0.89                 | 1.51 (0.95–2.41)    | 0.082                |
|               | -                                        | 1.71 (1.52–1.92)            | 6.9×10 <sup>-20</sup> | 1.27 (1.12–1.44)                         | 2.5×10 <sup>-4</sup> | 1.42 (1.22–1.66)    | 5.3×10 <sup>-6</sup> |
|               | HDL-C + triglycerides                    | 1.62 (1.44–1.82)            | 1.4×10 <sup>-15</sup> | 1.27 (1.11–1.44)                         | 3.9×10 <sup>-4</sup> | 1.37 (1.18–1.61)    | 5.7×10 <sup>-5</sup> |
| HDL-C         | non-HDL-C                                | 0.91 (0.64–1.31)            | 0.62                  | 1.30 (0.88–1.91)                         | 0.19                 | 0.96 (0.61–1.53)    | 0.88                 |
|               | -                                        | 0.73 (0.64–0.82)            | 2.0×10 <sup>-7</sup>  | 0.95 (0.83–1.08)                         | 0.41                 | 0.87 (0.75–1.01)    | 0.074                |
|               | LDL-C + triglycerides                    | 0.85 (0.74–0.97)            | 0.017                 | 0.98 (0.85–1.13)                         | 0.79                 | 0.98 (0.83–1.16)    | 0.83                 |
| Triglycerides | non-HDL-C + triglycerides                | 0.85 (0.74–0.97)            | 0.019                 | 0.98 (0.85–1.13)                         | 0.80                 | 0.98 (0.83–1.17)    | 0.83                 |
|               | -                                        | 1.77 (1.44–2.17)            | 5.3×10 <sup>-8</sup>  | 1.09 (0.87–1.36)                         | 0.44                 | 1.46 (1.12–1.89)    | 0.0048               |
|               | LDL-C + HDL-C                            | 1.31 (1.03–1.65)            | 0.025                 | 0.99 (0.77–1.27)                         | 0.91                 | 1.28 (0.95–1.72)    | 0.10                 |
|               | non-HDL-C + HDL-C                        | 0.96 (0.74–1.24)            | 0.77                  | 0.85 (0.65–1.12)                         | 0.26                 | 1.05 (0.76–1.46)    | 0.76                 |

Abbreviations: CAD, coronary artery disease; CI, confidence interval; HDL-C, high-density lipoprotein cholesterol; LDL-C, low-density lipoprotein cholesterol. Sample sizes (n<sub>cases</sub>/n<sub>controls</sub>): obstructive CAD (8984/3476), multivessel disease (5289/3695) and 3-vessel disease (2072/6157).

Odds ratios are scaled to correspond to a 1 SD increase in the respective cholesterol trait or for doubling of triglyceride levels. For non-HDL-C, LDL-C and HDL-C, this corresponds to 0.97 mmol/L [38 mg/dL], 0.87 mmol/L [34 mg/dL] and 0.38 mmol/L [15 mg/dL], respectively.

<sup>a</sup> In all models, age, age<sup>2</sup> and sex were included as covariates in addition to the genetic scores.

eTable 5: Lipid levels in Genotyped Icelanders

| Lipid trait         | n       | Average raw measurements |             | Average adjusted residuals <sup>a</sup> |      |
|---------------------|---------|--------------------------|-------------|-----------------------------------------|------|
|                     |         | Mean (mmol/L)            | SD (mmol/L) | Mean                                    | SD   |
| Total cholesterol   | 103 599 | 5.40                     | 0.98        | -0.044                                  | 0.94 |
| non-HDL cholesterol | 93 556  | 3.98                     | 0.98        | -0.067                                  | 0.97 |
| LDL cholesterol     | 87 212  | 3.34                     | 0.90        | -0.019                                  | 0.87 |
| HDL cholesterol     | 93 746  | 1.44                     | 0.41        | 0.026                                   | 0.38 |
| Triglycerides       | 94 242  | 1.45                     | 0.81        | -0.066                                  | 0.47 |

To convert from mmol/L to mg/dL, multiply by 38.7 for cholesterol traits and by 88.6 for triglycerides.  
<sup>a</sup> Levels of total cholesterol, non-HDL cholesterol and LDL cholesterol were adjusted for lipid-lowering medications (see **eMethods**) and residuals obtained after accounting for age, age<sup>2</sup>, sex, measurement site and county of birth. For individuals with multiple measurements, we used the average of the adjusted residuals. Lipid levels are shown in mmol/L for cholesterol traits and log<sub>e</sub>-transformed values for triglycerides (original units, mmol/L).

eTable 6: Association of the non-HDL-C Genetic Score with Coronary Artery Disease

| Genetic Score | Covariates (Genetic Scores) | Iceland    |                       | UK Biobank |                        |
|---------------|-----------------------------|------------|-----------------------|------------|------------------------|
|               |                             | Odds Ratio | P Value               | Odds Ratio | P Value                |
| non-HDL-C     | -                           | 1.61       | 1.2×10 <sup>-49</sup> | 1.52       | 4.4×10 <sup>-138</sup> |
|               | HDL-C                       | 1.56       | 3.9×10 <sup>-40</sup> | 1.49       | 7.9×10 <sup>-116</sup> |
|               | HDL-C + triglycerides       | 1.55       | 5.7×10 <sup>-33</sup> | 1.47       | 3.3×10 <sup>-94</sup>  |
|               | LDL-C                       | 1.79       | 7.8×10 <sup>-9</sup>  | 1.81       | 5.9×10 <sup>-28</sup>  |

The non-HDL-C genetic score for UK Biobank participants was calculated using the identical set of variants and weights as shown in **eTable 1**.  
Sample sizes: Iceland: n = 19 123 cases and 124 461 controls; UK Biobank: n = 28 110 cases and 380 455 controls.  
Analyses were adjusted for age, sex, year of birth and 40 principal components (UK Biobank) or county of birth (Iceland).  
Odds ratios are given for 1 unit increase in the score.

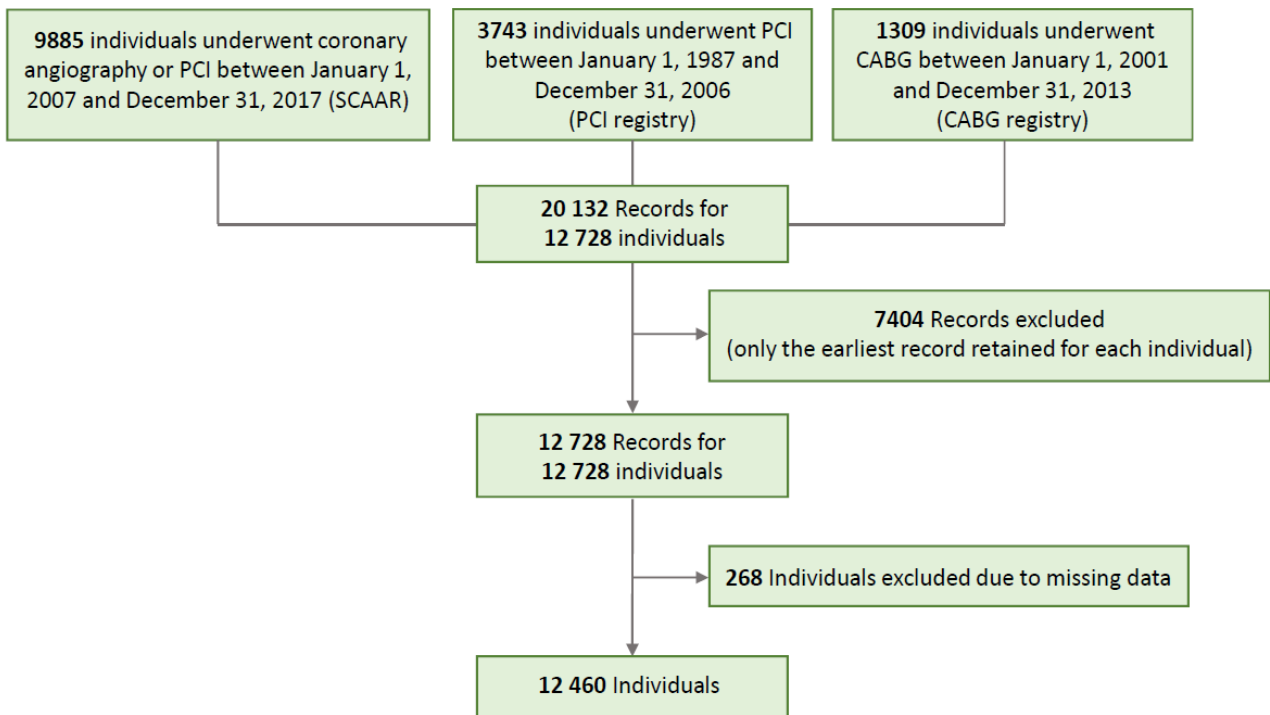

eFigure 1. Generation of the Combined Coronary Angiography Dataset



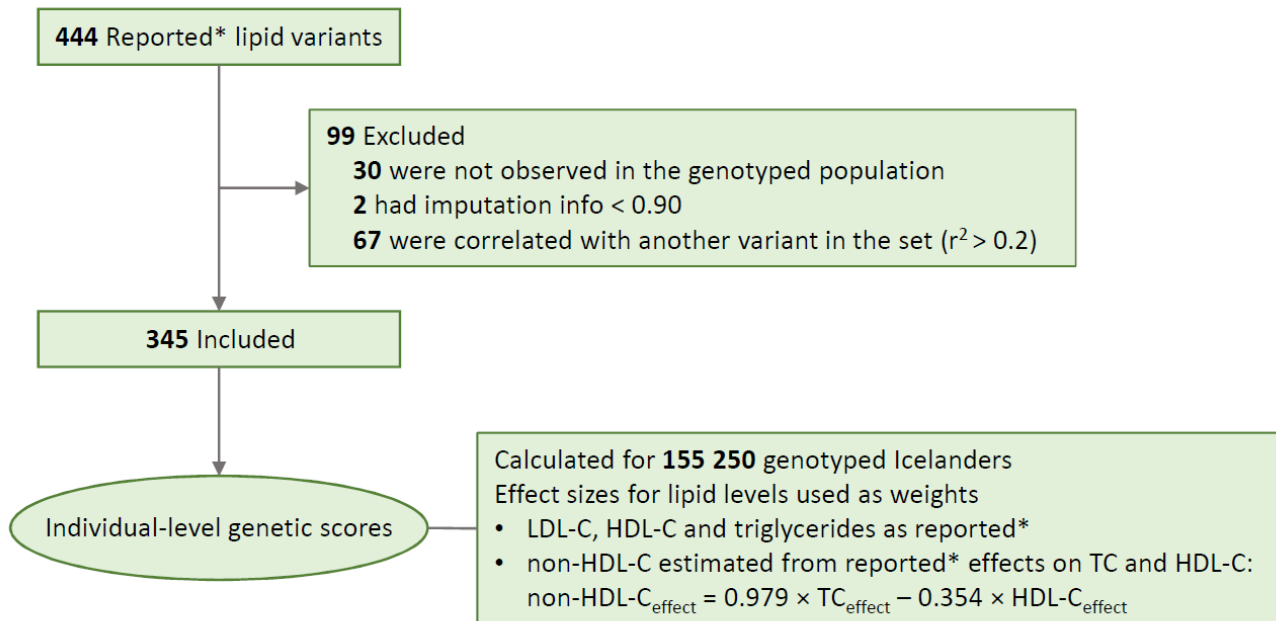

\*Liu DJ *et al.* Exome-wide association study of plasma lipids in >300,000 individuals. *Nat Genet.* 2017;49(12):1758-1766.

eFigure 2. Selection of Lipid Variants and Calculation of Genetic Scores

## References

1. Sudlow C, Gallacher J, Allen N, Beral V, Burton P, Danesh J, Downey P, Elliott P, Green J, Landray M, Liu B, Matthews P, Ong G, Pell J, Silman A, Young A, Sprosen T, Peakman T, Collins R. UK Biobank: An Open Access Resource for Identifying the Causes of a Wide Range of Complex Diseases of Middle and Old Age. *PLOS Med* 2015;**12**:e1001779.
2. Bycroft C, Freeman C, Petkova D, Band G, Elliott LT, Sharp K, Motyer A, Vukcevic D, Delaneau O, O'Connell J, Cortes A, Welsh S, Young A, Effingham M, McVean G, Leslie S, Allen N, Donnelly P, Marchini J. The UK Biobank resource with deep phenotyping and genomic data. *Nature* 2018;**562**:203–209.
3. Helgadóttir A, Gretarsdóttir S, Thorleifsson G, Hjartarson E, Sigurdsson A, Magnusdóttir A, Jonasdóttir A, Kristjánsson H, Sulem P, Oddsson A, Sveinbjörnsson G, Steinthorsdóttir V, Rafnar T, Masson G, Jonsdóttir I, Olafsson I, Eyjolfsson GI, Sigurdardóttir O, Daneshpour MS, Khalili D, Azizi F, Swinkels DW, Kiemeny L, Quyyumi AA, Levey AI, Patel RS, Hayek SS, Gudmundsdóttir IJ, Thorgeirsson G, Thorsteinsdóttir U, et al. Variants with large effects on blood lipids and the role of cholesterol and triglycerides in coronary disease. *Nat Genet* 2016;**48**:634–639.
4. Friedewald WT, Levy RI, Fredrickson DS. Estimation of the concentration of low-density lipoprotein cholesterol in plasma, without use of the preparative ultracentrifuge. *Clin Chem* 1972;**18**:499–502.
5. Liu DJ, Peloso GM, Yu H, Butterworth AS, Wang X, Mahajan A, Saleheen D, Emdin C, Alam D, Alves AC, Amouyel P, Angelantonio E Di, Arveiler D, Assimes TL, Auer PL, Baber U, Ballantyne CM, Bang LE, Benn M, Bis JC, Boehnke M, Boerwinkle E, Bork-Jensen J, Bottinger EP, Brandslund I, Brown M, Busonero F, Caulfield MJ, Chambers JC, Chasman DI, et al. Exome-wide association study of plasma lipids in >300,000 individuals. *Nat Genet* 2017;**49**:1758–1766.
